# Supplementary material for: Comparative genomics and DNA methylation analysis of Pseudomonas aeruginosa clinical isolate PA3 by single-molecule real-time sequencing reveals new targets for antimicrobials
Source: Front Cell Infect Microbiol. 2023 Aug 18;13:1180194. doi: 10.3389/fcimb.2023.1180194 (PMC10471985; doi:10.3389/fcimb.2023.1180194)
Supplement: Supplementary Table 3 — Transcription factors of P. aeruginosa PA3. [file Table_3.xlsx]

## Sheet: Sheet1
	Transcription factors of P. aeruginosa PA3 (428 proteins)
	Gene	Class	Type	P2RP description
	Candidate1007_884682_885104_+	TR	MarR	Transcription factor, MarR family contains 1 MarR
	Candidate1010_887137_888639_-	OCS	GntR	Transcription factor, GntR family contains 1 GntR,1 Aminotran_1_2
	Candidate1023_900338_901249_+	OCS	AraC	Transcription factor, AraC family contains 1 AraC_binding,1 HTH_AraC
	Candidate1038_915793_916695_+	OCS	LysR	Transcription factor, LysR family contains 1 HTH_1,1 LysR_substrate
	Candidate1049_923690_924964_-	RR	OmpR	Response regulator, OmpR family contains 1 Response_reg,1 Trans_reg_C
	Candidate1054_931324_933207_+	TR	AraC	Transcription factor, AraC family contains 1 HTH_AraC
	Candidate1074_949929_950573_+	RR	NarL	Response regulator, NarL family contains 1 Response_reg,1 HTH_LUXR
	Candidate1079_955555_956223_-	TR	LuxR	Transcription factor, LuxR family contains 1 HTH_LUXR
	Candidate1083_960260_961261_+	TR	AraC	Transcription factor, AraC family contains 1 HTH_AraC
	Candidate1097_970415_971026_+	TR	NrdR	Transcription factor, NrdR family contains 1 nrdR
	Candidate1125_995065_995781_+	RR	OmpR	Response regulator, OmpR family contains 1 Response_reg,1 Trans_reg_C
	Candidate1166_1032100_1033005_-	OCS	LysR	Transcription factor, LysR family contains 1 HTH_1,1 LysR_substrate
	Candidate1188_1054350_1055033_+	TR	TetR	Transcription factor, TetR family contains 1 TetR_N
	Candidate1197_1062081_1062623_-	TR	MarR	Transcription factor, MarR family contains 1 MarR,1 AsnC_trans_reg
	Candidate1217_1078527_1079156_-	RR	NarL	Response regulator, NarL family contains 1 Response_reg,1 HTH_LUXR
	Candidate1245_1104142_1104975_-	TR	AraC	Transcription factor, AraC family contains 2 HTH_AraC
	Candidate1278_1140037_1140546_-	SF	Ecf	Sigma factor, Ecf family contains 1 Sigma70_r2,1 Sigma70_r4
	Candidate1279_1140647_1141633_-	TR	AraC	Transcription factor, AraC family contains 1 HTH_AraC
	Candidate1282_1143646_1144599_-	OCS	LysR	Transcription factor, LysR family contains 1 HTH_1,1 LysR_substrate
	Candidate1303_1160295_1160954_-	RR	NarL	Response regulator, NarL family contains 1 Response_reg,1 HTH_LUXR
	Candidate1350_1200554_1201450_-	OCS	LysR	Transcription factor, LysR family contains 1 HTH_1,1 LysR_substrate
	Candidate1368_1216830_1217642_+	OCS	AraC	Transcription factor, AraC family contains 1 AraC_binding,2 HTH_AraC
	Candidate1383_1232780_1233271_+	TR	Rrf2	Transcription factor, Rrf2 family contains 1 Rrf2
	Candidate1395_1240902_1241945_+	TR	Xre	Transcription factor, Xre family contains 1 HTH_XRE
	Candidate1421_1263130_1264083_+	OCS	AraC	Transcription factor, AraC family contains 1 DJ-1_PfpI,1 HTH_AraC
	Candidate1427_1267883_1268818_-	OCS	LysR	Transcription factor, LysR family contains 1 HTH_1,1 LysR_substrate
	Candidate1429_1270241_1271164_-	OCS	LysR	Transcription factor, LysR family contains 1 HTH_1,1 LysR_substrate
	Candidate1453_1301529_1302272_-	OCS	GntR	Transcription factor, GntR family contains 1 GntR,1 UTRA
	Candidate1495_1342518_1343282_-	TR	TetR	Transcription factor, TetR family contains 1 TetR_N
	Candidate1503_1348706_1349347_-	RR	NarL	Response regulator, NarL family contains 1 Response_reg,1 HTH_LUXR
	Candidate1508_1352587_1353492_-	OCS	LysR	Transcription factor, LysR family contains 1 HTH_1,1 LysR_substrate
	Candidate1521_1369004_1369717_+	TR	TetR	Transcription factor, TetR family contains 1 TetR_N
	Candidate1533_1378266_1378736_+	TR	MerR	Transcription factor, MerR family contains 1 MerR,1 MerR-DNA-bind
	Candidate1545_1388579_1389229_-	TR	TetR	Transcription factor, TetR family contains 1 TetR_N
	Candidate155_136672_137235_+	TR	HxlR	Transcription factor, HxlR family contains 1 HxlR
	Candidate1598_1443631_1444539_-	OCS	LysR	Transcription factor, LysR family contains 1 HTH_1,1 LysR_substrate
	Candidate1609_1450740_1451744_+	SF	－	Sigma factor, RpoE family contains 1 Sigma70_r1_2,1 Sigma70_r2,1 Sigma70_r3,1 Sigma70_r4
	Candidate160_140460_141146_+	TR	GntR	Transcription factor, GntR family contains 1 GntR
	Candidate161_141247_141981_+	TR	GntR	Transcription factor, GntR family contains 1 GntR
	Candidate1631_1470611_1471264_+	RR	NarL	Response regulator, NarL family contains 1 Response_reg,1 HTH_LUXR
	Candidate1636_1474074_1474859_-	TR	LuxR	Transcription factor, LuxR family contains 1 HTH_LUXR
	Candidate1641_1480112_1481008_-	OCS	LysR	Transcription factor, LysR family contains 1 HTH_1,1 LysR_substrate
	Candidate1648_1488989_1489909_-	OCS	LysR	Transcription factor, LysR family contains 1 HTH_1,1 LysR_substrate
	Candidate164_142603_143511_-	OCS	LysR	Transcription factor, LysR family contains 1 HTH_1,1 LysR_substrate
	Candidate1674_1504269_1504907_-	TR	TetR	Transcription factor, TetR family contains 1 TetR_N
	Candidate1678_1506762_1507685_-	OCS	AraC	Transcription factor, AraC family contains 1 AraC_binding,2 HTH_AraC
	Candidate1684_1513686_1514612_+	OCS	LysR	Transcription factor, LysR family contains 1 HTH_1,1 LysR_substrate
	Candidate1686_1515690_1516718_-	OCS	LacI	Transcription factor, LacI family contains 1 LacI,1 Peripla_BP_1
	Candidate1774_1604286_1605011_+	OCS	LuxR	Transcription factor, LuxR family contains 1 Autoind_bind,1 HTH_LUXR
	Candidate1797_1628459_1629307_+	TR	MarR	Transcription factor, MarR family contains 1 MarR
	Candidate179_151150_152067_+	OCS	LysR	Transcription factor, LysR family contains 1 HTH_1,1 LysR_substrate
	Candidate1829_1651554_1652447_-	OCS	LysR	Transcription factor, LysR family contains 1 HTH_1,1 LysR_substrate
	Candidate1839_1659608_1660492_-	TR	AraC	Transcription factor, AraC family contains 1 HTH_AraC
	Candidate1842_1663970_1666453_+	TR	LuxR	Transcription factor, LuxR family contains 1 HTH_LUXR
	Candidate1854_1674130_1674645_+	SF	Ecf	Sigma factor, Ecf family contains 1 Sigma70_r2,1 Sigma70_r4
	Candidate1866_1688687_1689613_-	OCS	LysR	Transcription factor, LysR family contains 1 HTH_1,1 LysR_substrate
	Candidate1880_1701557_1701883_-	TR	Unclassified	Transcription factor, Unclassified contains 1 Arc
	Candidate1885_1705020_1705742_+	OCS	GntR	Transcription factor, GntR family contains 1 GntR,1 UTRA
	Candidate1930_1740742_1741176_+	TR	MarR	Transcription factor, MarR family contains 1 MarR
	Candidate1955_1767950_1768552_+	TR	MerR	Transcription factor, MerR family contains 1 MerR
	Candidate198_169445_170119_+	SF	Ecf	Sigma factor, Ecf family contains 1 Sigma70_r2,1 Sigma70_r4
	Candidate2010_1814947_1815558_+	SF	Ecf	Sigma factor, Ecf family contains 1 Sigma70_r2,1 Sigma70_r4
	Candidate201_173576_174850_+	OCS	LysR	Transcription factor, LysR family contains 1 HTH_1,1 LysR_substrate
	Candidate2028_1834177_1835031_+	OCS	AraC	Transcription factor, AraC family contains 1 AraC_binding,2 HTH_AraC
	Candidate2044_1845204_1845515_+	TR	Xre	Transcription factor, Xre family contains 1 HTH_XRE
	Candidate2056_1857013_1857729_+	OCS	GntR	Transcription factor, GntR family contains 1 GntR,1 UTRA
	Candidate205_176730_177365_+	TR	IclR	Transcription factor, IclR family contains 1 IclR
	Candidate2083_1879897_1880826_-	OCS	LysR	Transcription factor, LysR family contains 1 HTH_1,1 LysR_substrate
	Candidate2089_1883545_1884309_-	TR	AraC	Transcription factor, AraC family contains 2 HTH_AraC
	Candidate208_182979_183917_+	OCS	LysR	Transcription factor, LysR family contains 1 HTH_1,1 LysR_substrate
	Candidate2095_1888378_1889391_+	TR	AraC	Transcription factor, AraC family contains 1 HTH_AraC
	Candidate2104_1898127_1898804_-	RR	OmpR	Response regulator, OmpR family contains 1 Response_reg,1 Trans_reg_C
	Candidate2119_1909041_1909769_+	RR	OmpR	Response regulator, OmpR family contains 1 Response_reg,1 Trans_reg_C
	Candidate2129_1918548_1919405_-	OCS	RpiR	Transcription factor, RpiR family contains 1 HTH_6,1 SIS
	Candidate212_186168_186959_-	OCS	AraC	Transcription factor, AraC family contains 1 AraC_binding,1 HTH_AraC
	Candidate2140_1928211_1928939_-	TR	IclR	Transcription factor, IclR family contains 1 HTH_IclR,1 IclR
	Candidate2182_1966103_1967023_+	OCS	LysR	Transcription factor, LysR family contains 1 HTH_1,1 LysR_substrate
	Candidate2187_1969396_1969938_+	TR	TetR	Transcription factor, TetR family contains 1 TetR_N
	Candidate2195_1976728_1977639_+	OCS	LysR	Transcription factor, LysR family contains 1 HTH_1,1 LysR_substrate
	Candidate2197_1978189_1979082_-	OCS	LysR	Transcription factor, LysR family contains 1 HTH_1,1 LysR_substrate
	Candidate2232_2008779_2009816_-	TR	AraC	Transcription factor, AraC family contains 1 HTH_AraC
	Candidate2253_2032440_2033126_-	RR	OmpR	Response regulator, OmpR family contains 1 Response_reg,1 Trans_reg_C
	Candidate2265_2047520_2047963_+	TR	MarR	Transcription factor, MarR family contains 1 MarR
	Candidate2278_2062651_2063127_+	TR	Xre	Transcription factor, Xre family contains 1 HTH_XRE
	Candidate2292_2074761_2075384_+	RR	NarL	Response regulator, NarL family contains 1 Response_reg,1 GerE
	Candidate2304_2085117_2086562_+	TR	TetR	Transcription factor, TetR family contains 1 TetR_N
	Candidate2315_2091704_2092735_-	TR	AraC	Transcription factor, AraC family contains 1 HTH_AraC
	Candidate232_206232_207164_-	OCS	LysR	Transcription factor, LysR family contains 1 HTH_1,1 LysR_substrate
	Candidate2338_2115426_2116040_-	OCS	LexA	Transcription factor, LexA family contains 1 LexA_DNA_bind,1 Peptidase_S24
	Candidate2339_2116149_2116973_+	TR	TetR	Transcription factor, TetR family contains 1 TetR_N
	Candidate2398_2166488_2167126_+	TR	TetR	Transcription factor, TetR family contains 1 TetR_N
	Candidate239_212549_213610_+	OCS	HxlR	Transcription factor, HxlR family contains 1 PBPb,1 HxlR
	Candidate2433_2196714_2197316_+	TR	TetR	Transcription factor, TetR family contains 1 TetR_N
	Candidate2434_2197327_2198253_-	OCS	LysR	Transcription factor, LysR family contains 1 HTH_1,1 LysR_substrate
	Candidate2444_2206625_2207620_+	OCS	LysR	Transcription factor, LysR family contains 1 HTH_1,1 LysR_substrate
	Candidate2449_2210647_2211483_+	OCS	AraC	Transcription factor, AraC family contains 1 AraC_binding,2 HTH_AraC
	Candidate246_218114_219031_-	OCS	LysR	Transcription factor, LysR family contains 1 HTH_1,1 LysR_substrate
	Candidate2471_2229533_2230171_+	RR	NarL	Response regulator, NarL family contains 1 Response_reg,1 HTH_LUXR
	Candidate2474_2230847_2232286_+	OCS	GntR	Transcription factor, GntR family contains 1 GntR,1 Aminotran_1_2
	Candidate2475_2232474_2233199_+	SF	Ecf	Sigma factor, Ecf family contains 1 Sigma70_r2,1 Sigma70_r4
	Candidate2486_2246237_2246974_+	TR	TetR	Transcription factor, TetR family contains 1 TetR_N
	Candidate2494_2250716_2252050_+	OCS	LysR	Transcription factor, LysR family contains 1 HTH_1,1 LysR_substrate
	Candidate2496_2252760_2253653_+	OCS	LysR	Transcription factor, LysR family contains 1 HTH_1,1 LysR_substrate
	Candidate2532_2280079_2280534_-	TR	MarR	Transcription factor, MarR family contains 1 MarR
	Candidate2534_2280620_2281639_-	OCS	LysR	Transcription factor, LysR family contains 1 HTH_1,1 LysR_substrate
	Candidate2536_2282427_2283281_-	OCS	LysR	Transcription factor, LysR family contains 1 HTH_1,1 LysR_substrate
	Candidate2548_2291268_2292236_-	OCS	LysR	Transcription factor, LysR family contains 1 HTH_1,1 LysR_substrate
	Candidate2553_2296514_2297473_-	OCS	LysR	Transcription factor, LysR family contains 1 HTH_1,1 LysR_substrate
	Candidate2564_2303962_2304453_+	TR	MarR	Transcription factor, MarR family contains 1 MarR
	Candidate2575_2314334_2314663_+	TR	Xre	Transcription factor, Xre family contains 1 HTH_XRE
	Candidate2576_2314668_2315576_-	OCS	LysR	Transcription factor, LysR family contains 1 HTH_1,1 LysR_substrate
	Candidate2591_2324233_2324937_+	RR	OmpR	Response regulator, OmpR family contains 1 Response_reg,1 Trans_reg_C
	Candidate2594_2327207_2327620_+	TR	GntR	Transcription factor, GntR family contains 1 GntR
	Candidate2600_2330219_2330548_+	TR	PadR	Transcription factor, PadR family contains 1 PadR
	Candidate2665_2381536_2381943_+	TR	MerR	Transcription factor, MerR family contains 1 MerR,1 MerR-DNA-bind
	Candidate2682_2390504_2390902_+	TR	MerR	Transcription factor, MerR family contains 1 MerR,1 MerR-DNA-bind
	Candidate2699_2402570_2402782_-	TR	AlpA	Transcription factor, AlpA family contains 1 Phage_AlpA
	Candidate270_236427_237320_+	OCS	LysR	Transcription factor, LysR family contains 1 HTH_1,1 LysR_substrate
	Candidate2714_2415218_2415904_-	RR	OmpR	Response regulator, OmpR family contains 1 Response_reg,1 Trans_reg_C
	Candidate2722_2419811_2420530_+	OCS	GntR	Transcription factor, GntR family contains 1 GntR,1 UTRA
	Candidate2774_2446034_2446885_-	OCS	LexA	Transcription factor, LexA family contains 1 HTH_3,1 Peptidase_S24
	Candidate2776_2446983_2447201_+	TR	Xre	Transcription factor, Xre family contains 1 HTH_3
	Candidate2799_2461242_2461727_-	TR	Xre	Transcription factor, Xre family contains 1 HTH_XRE
	Candidate279_244899_245828_-	OCS	LysR	Transcription factor, LysR family contains 1 HTH_1,1 LysR_substrate
	Candidate281_246645_247565_-	OCS	LysR	Transcription factor, LysR family contains 1 HTH_1,1 LysR_substrate
	Candidate2841_2489862_2490242_-	TR	Xre	Transcription factor, Xre family contains 1 HTH_XRE
	Candidate2863_2501890_2502471_+	TR	TetR	Transcription factor, TetR family contains 1 TetR_N
	Candidate2879_2508870_2509757_-	OCS	LysR	Transcription factor, LysR family contains 1 HTH_1,1 LysR_substrate
	Candidate290_255488_256027_+	TR	Xre	Transcription factor, Xre family contains 1 HTH_XRE
	Candidate2913_2528209_2528574_+	TR	MerR	Transcription factor, MerR family contains 1 MerR
	Candidate292_257026_257808_+	TR	DeoR	Transcription factor, DeoR family contains 1 DeoR
	Candidate2951_2561510_2561998_-	TR	MerR	Transcription factor, MerR family contains 1 MerR,1 MerR-DNA-bind
	Candidate2970_2576215_2577234_+	TR	AraC	Transcription factor, AraC family contains 1 HTH_11,1 HTH_AraC
	Candidate2979_2585050_2585868_+	TR	AraC	Transcription factor, AraC family contains 2 HTH_AraC
	Candidate2982_2588188_2588739_-	TR	Rrf2	Transcription factor, Rrf2 family contains 1 Rrf2
	Candidate2988_2594958_2595674_-	RR	OmpR	Response regulator, OmpR family contains 1 Response_reg,1 Trans_reg_C
	Candidate298_263253_264194_+	OCS	LysR	Transcription factor, LysR family contains 1 HTH_1,1 LysR_substrate
	Candidate2995_2604758_2606683_-	OCS	LysR	Transcription factor, LysR family contains 1 HTH_1,1 LysR_substrate
	Candidate301_267413_268192_+	TR	IclR	Transcription factor, IclR family contains 1 HTH_IclR,1 IclR
	Candidate3024_2625748_2626419_+	RR	OmpR	Response regulator, OmpR family contains 1 Response_reg,1 Trans_reg_C
	Candidate309_276570_277238_+	TR	TetR	Transcription factor, TetR family contains 1 TetR_N
	Candidate3104_2696290_2696760_+	TR	Xre	Transcription factor, Xre family contains 1 HTH_XRE
	Candidate3147_2726536_2727432_+	OCS	LysR	Transcription factor, LysR family contains 1 HTH_1,1 LysR_substrate
	Candidate315_281734_282600_+	OCS	AraC	Transcription factor, AraC family contains 1 AraC_binding,1 HTH_AraC
	Candidate3167_2742114_2743142_-	TR	AraC	Transcription factor, AraC family contains 1 HTH_AraC
	Candidate3170_2745250_2745894_+	RR	NarL	Response regulator, NarL family contains 1 Response_reg,1 GerE
	Candidate3186_2757325_2757762_-	TR	AsnC	Transcription factor, AsnC family contains 1 HTH_IclR,1 AsnC_trans_reg
	Candidate3218_2778872_2779957_+	TR	AraC	Transcription factor, AraC family contains 1 HTH_AraC
	Candidate321_284995_285606_-	TR	MarR	Transcription factor, MarR family contains 1 MarR
	Candidate3223_2785070_2786062_-	OCS	LysR	Transcription factor, LysR family contains 1 HTH_1,1 LysR_substrate
	Candidate3229_2790243_2791148_-	OCS	LysR	Transcription factor, LysR family contains 1 HTH_1,1 LysR_substrate
	Candidate3243_2806334_2807245_+	OCS	LysR	Transcription factor, LysR family contains 1 HTH_1,1 LysR_substrate
	Candidate3255_2824667_2825341_-	RR	OmpR	Response regulator, OmpR family contains 1 Response_reg,1 Trans_reg_C
	Candidate3262_2832033_2832989_+	OCS	AraC	Transcription factor, AraC family contains 1 AraC_binding,2 HTH_AraC
	Candidate3270_2840036_2841037_+	TR	AraC	Transcription factor, AraC family contains 2 HTH_AraC
	Candidate3286_2852927_2853817_+	OCS	LysR	Transcription factor, LysR family contains 1 HTH_1,1 LysR_substrate
	Candidate3294_2860646_2861560_-	OCS	LysR	Transcription factor, LysR family contains 1 HTH_1,1 LysR_substrate
	Candidate3299_2863314_2864129_-	OCS	AraC	Transcription factor, AraC family contains 1 AraC_binding,1 HTH_AraC
	Candidate3300_2864156_2864920_-	TR	AraC	Transcription factor, AraC family contains 2 HTH_AraC
	Candidate3304_2865834_2866448_+	TR	TetR	Transcription factor, TetR family contains 1 TetR_N
	Candidate3310_2870733_2871413_-	RR	OmpR	Response regulator, OmpR family contains 1 Response_reg,1 Trans_reg_C
	Candidate3322_2881259_2881663_+	TR	LysR	Transcription factor, LysR family contains 1 HTH_1
	Candidate3324_2881977_2882777_+	SF	Ecf	Sigma factor, Ecf family contains 1 Sigma70_r2,1 Sigma70_r4
	Candidate3351_2920886_2921809_+	OCS	LysR	Transcription factor, LysR family contains 1 HTH_1,1 LysR_substrate
	Candidate3368_2939684_2940610_-	OCS	LysR	Transcription factor, LysR family contains 1 HTH_1,1 LysR_substrate
	Candidate3376_2946402_2947022_-	SF	Ecf	Sigma factor, Ecf family contains 1 Sigma70_r2,1 Sigma70_r4
	Candidate3399_2970761_2971699_+	OCS	LysR	Transcription factor, LysR family contains 1 HTH_1,1 LysR_substrate
	Candidate3435_3030974_3031453_+	SF	Ecf	Sigma factor, Ecf family contains 1 Sigma70_r2,1 Sigma70_r4
	Candidate3439_3035509_3035832_+	TR	Unclassified	Transcription factor, Unclassified contains 1 Pencillinase_R
	Candidate3440_3035874_3036794_+	OCS	LysR	Transcription factor, LysR family contains 1 HTH_1,1 LysR_substrate
	Candidate3452_3043768_3044409_-	RR	NarL	Response regulator, NarL family contains 1 Response_reg,1 HTH_LUXR
	Candidate3496_3090804_3091709_-	TR	AraC	Transcription factor, AraC family contains 2 HTH_AraC
	Candidate3500_3095743_3096654_+	OCS	LysR	Transcription factor, LysR family contains 1 HTH_1,1 LysR_substrate
	Candidate3503_3098368_3099273_-	TR	AraC	Transcription factor, AraC family contains 2 HTH_AraC
	Candidate3517_3112508_3113743_+	OCS	LacI	Transcription factor, LacI family contains 1 LacI,1 Peripla_BP_1
	Candidate3521_3116290_3117183_-	OCS	LysR	Transcription factor, LysR family contains 1 HTH_1,1 LysR_substrate
	Candidate3525_3120605_3121237_-	TR	Xre	Transcription factor, Xre family contains 1 HTH_XRE
	Candidate3541_3140905_3141687_+	OCS	GntR	Transcription factor, GntR family contains 1 GntR,1 UTRA
	Candidate354_308362_309783_-	OCS	GntR	Transcription factor, GntR family contains 1 GntR,1 Aminotran_1_2
	Candidate3560_3160725_3161669_+	TR	AraC	Transcription factor, AraC family contains 2 HTH_AraC
	Candidate3565_3164185_3164535_-	TR	ArsR	Transcription factor, ArsR family contains 1 HTH_5
	Candidate3566_3164614_3165504_-	TR	AraC	Transcription factor, AraC family contains 1 AraC_N,2 HTH_AraC
	Candidate3569_3167254_3167724_+	TR	MerR	Transcription factor, MerR family contains 1 MerR,1 MerR-DNA-bind
	Candidate3572_3170074_3170664_-	TR	TetR	Transcription factor, TetR family contains 1 TetR_N
	Candidate3583_3182271_3183293_-	OCS	LacI	Transcription factor, LacI family contains 1 LacI,1 Peripla_BP_1
	Candidate3587_3183856_3184794_+	OCS	LysR	Transcription factor, LysR family contains 1 HTH_1,1 LysR_substrate
	Candidate3601_3198111_3198572_+	TR	AsnC	Transcription factor, AsnC family contains 1 HTH_IclR,1 AsnC_trans_reg
	Candidate361_314319_315005_-	OCS	Crp	Transcription factor, Crp family contains 1 cNMP_binding,1 HTH_CRP
	Candidate3624_3221448_3222437_+	TR	AraC	Transcription factor, AraC family contains 1 HTH_AraC
	Candidate365_317412_318110_+	TR	ArsR	Transcription factor, ArsR family contains 1 HTH_5
	Candidate3673_3250455_3251036_+	TR	TetR	Transcription factor, TetR family contains 1 TetR_N
	Candidate3712_3287752_3288699_+	OCS	LysR	Transcription factor, LysR family contains 1 HTH_1,1 LysR_substrate
	Candidate3722_3296936_3297529_-	TR	TetR	Transcription factor, TetR family contains 1 TetR_N
	Candidate376_328809_329771_+	OCS	LysR	Transcription factor, LysR family contains 1 HTH_1,1 LysR_substrate
	Candidate3816_3377082_3378014_-	OCS	LysR	Transcription factor, LysR family contains 1 HTH_1,1 LysR_substrate
	Candidate3818_3379313_3380218_+	OCS	LysR	Transcription factor, LysR family contains 1 HTH_1,1 LysR_substrate
	Candidate3824_3382759_3383835_-	OCS	AraC	Transcription factor, AraC family contains 1 Ada_Zn_binding,1 HTH_AraC
	Candidate3827_3385896_3386960_-	OCS	LysR	Transcription factor, LysR family contains 1 HTH_1,1 LysR_substrate
	Candidate383_335218_335883_-	TR	TetR	Transcription factor, TetR family contains 1 TetR_N
	Candidate3842_3400417_3401850_+	OCS	GntR	Transcription factor, GntR family contains 1 GntR,1 Aminotran_1_2
	Candidate3849_3405373_3406407_+	TR	AraC	Transcription factor, AraC family contains 1 HTH_AraC
	Candidate3852_3408356_3408865_-	SF	Ecf	Sigma factor, Ecf family contains 1 Sigma70_r2,1 Sigma70_r4
	Candidate3861_3421591_3422067_-	TR	MarR	Transcription factor, MarR family contains 1 MarR,1 AsnC_trans_reg
	Candidate3868_3429798_3431513_-	OCS	LysR	Transcription factor, LysR family contains 1 HTH_1,1 LysR_substrate
	Candidate3895_3460879_3461781_-	OCS	LysR	Transcription factor, LysR family contains 1 HTH_1,1 LysR_substrate
	Candidate3897_3463314_3464201_-	OCS	LysR	Transcription factor, LysR family contains 1 HTH_1,1 LysR_substrate
	Candidate3899_3465018_3465488_+	OCS	Xre	Transcription factor, Xre family contains 1 HTH_XRE,1 Cyanate_lyase
	Candidate3901_3466482_3467159_-	SF	Ecf	Sigma factor, Ecf family contains 1 Sigma70_r2,1 Sigma70_r4
	Candidate3906_3470252_3471184_+	TR	AraC	Transcription factor, AraC family contains 1 AraC_N,1 HTH_AraC
	Candidate3924_3485982_3487406_-	OCS	GntR	Transcription factor, GntR family contains 1 GntR,1 Aminotran_1_2
	Candidate3928_3488492_3488818_-	TR	AsnC	Transcription factor, AsnC family contains 1 AsnC_trans_reg
	Candidate3937_3496070_3496702_-	TR	TetR	Transcription factor, TetR family contains 1 TetR_N
	Candidate3942_3502573_3502977_+	TR	MerR	Transcription factor, MerR family contains 1 MerR,1 MerR-DNA-bind
	Candidate3948_3509685_3510488_-	TR	IclR	Transcription factor, IclR family contains 1 HTH_IclR,1 IclR
	Candidate3977_3542810_3543481_-	RR	NarL	Response regulator, NarL family contains 1 Response_reg,1 HTH_LUXR
	Candidate3980_3544809_3545474_+	RR	NarL	Response regulator, NarL family contains 1 Response_reg,1 GerE
	Candidate3998_3563345_3564400_+	OCS	LysR	Transcription factor, LysR family contains 1 HTH_1,1 LysR_substrate
	Candidate4011_3573805_3574818_-	OCS	LacI	Transcription factor, LacI family contains 1 LacI,1 Peripla_BP_1
	Candidate4053_3613640_3615667_+	TR	NrdR	Transcription factor, NrdR family contains 1 nrdR
	Candidate4059_3619846_3621393_+	TR	PucR	Transcription factor, PucR family contains 1 PucR
	Candidate4062_3624066_3624572_+	SF	Ecf	Sigma factor, Ecf family contains 1 Sigma70_r2,1 Sigma70_r4
	Candidate4079_3640079_3640810_-	OCS	LuxR	Transcription factor, LuxR family contains 1 Autoind_bind,1 HTH_LUXR
	Candidate40_34628_35527_+	OCS	LysR	Transcription factor, LysR family contains 1 HTH_1,1 LysR_substrate
	Candidate4100_3656029_3656610_+	TR	Xre	Transcription factor, Xre family contains 1 HTH_XRE
	Candidate4105_3660491_3661045_+	TR	Xre	Transcription factor, Xre family contains 1 HTH_XRE
	Candidate4124_3685612_3686262_+	TR	TetR	Transcription factor, TetR family contains 1 TetR_N
	Candidate4129_3689854_3690741_+	OCS	LysR	Transcription factor, LysR family contains 1 HTH_1,1 LysR_substrate
	Candidate4136_3695866_3696984_-	OCS	LysR	Transcription factor, LysR family contains 1 HTH_1,1 LysR_substrate
	Candidate4140_3698793_3699797_+	OCS	AraC	Transcription factor, AraC family contains 1 DJ-1_PfpI,2 HTH_AraC
	Candidate4159_3714941_3715522_-	TR	TetR	Transcription factor, TetR family contains 1 TetR_N
	Candidate4170_3723608_3724513_+	OCS	LysR	Transcription factor, LysR family contains 1 HTH_1,1 LysR_substrate
	Candidate4201_3757108_3757815_+	RR	OmpR	Response regulator, OmpR family contains 1 Response_reg,1 Trans_reg_C
	Candidate4233_3788475_3789065_-	SF	Ecf	Sigma factor, Ecf family contains 1 Sigma70_r2,1 Sigma70_r4
	Candidate4255_3805293_3809648_-	TR	LuxR	Transcription factor, LuxR family contains 1 HTH_LUXR
	Candidate4256_3808019_3810787_-	TR	LuxR	Transcription factor, LuxR family contains 1 HTH_LUXR
	Candidate4261_3814317_3815291_-	OCS	LysR	Transcription factor, LysR family contains 1 HTH_1,1 LysR_substrate
	Candidate4284_3826033_3826947_+	OCS	LysR	Transcription factor, LysR family contains 1 HTH_1,1 LysR_substrate
	Candidate4312_3851425_3852261_-	TR	AraC	Transcription factor, AraC family contains 2 HTH_AraC
	Candidate4385_3917672_3918148_+	TR	MarR	Transcription factor, MarR family contains 1 MarR
	Candidate43_36267_36890_-	RR	NarL	Response regulator, NarL family contains 1 Response_reg,1 GerE
	Candidate4405_3934233_3934925_-	RR	OmpR	Response regulator, OmpR family contains 1 Response_reg,1 Trans_reg_C
	Candidate4412_3943671_3944537_-	TR	IclR	Transcription factor, IclR family contains 1 HTH_IclR,1 IclR
	Candidate4415_3947235_3947882_+	TR	GntR	Transcription factor, GntR family contains 1 GntR
	Candidate4424_3954467_3955291_-	OCS	AraC	Transcription factor, AraC family contains 1 AraC_binding,1 HTH_AraC
	Candidate4439_3968427_3968867_+	TR	HxlR	Transcription factor, HxlR family contains 1 HxlR
	Candidate4444_3971554_3971985_+	TR	MarR	Transcription factor, MarR family contains 1 MarR
	Candidate4450_3976288_3977070_-	OCS	AraC	Transcription factor, AraC family contains 1 AraC_binding,2 HTH_AraC
	Candidate4485_4005766_4006647_-	OCS	LysR	Transcription factor, LysR family contains 1 HTH_1,1 LysR_substrate
	Candidate4521_4036402_4037136_+	OCS	Crp	Transcription factor, Crp family contains 1 cNMP_binding,1 HTH_CRP
	Candidate4540_4056859_4057518_-	TR	GntR	Transcription factor, GntR family contains 1 GntR
	Candidate4567_4077499_4078074_-	TR	HxlR	Transcription factor, HxlR family contains 1 HxlR
	Candidate4576_4085429_4086169_-	SF	Ecf	Sigma factor, Ecf family contains 1 Sigma70_r2,1 Sigma70_r4
	Candidate4581_4088978_4089820_+	TR	Xre	Transcription factor, Xre family contains 1 HTH_XRE
	Candidate4588_4094701_4095945_-	SF	Unclassified	Sigma factor, Unclassified contains 1 Sigma70_r2
	Candidate4609_4112250_4113575_+	RR	NtrC	Response regulator, NtrC family contains 1 Response_reg,1 AAA_5,1 HTH_8
	Candidate4618_4119256_4120164_+	OCS	LysR	Transcription factor, LysR family contains 1 HTH_1,1 LysR_substrate
	Candidate4635_4135046_4135660_+	TR	TetR	Transcription factor, TetR family contains 1 TetR_N
	Candidate4638_4137510_4138442_+	OCS	LysR	Transcription factor, LysR family contains 1 HTH_1,1 LysR_substrate
	Candidate4641_4140639_4141499_+	OCS	LysR	Transcription factor, LysR family contains 1 HTH_1,1 LysR_substrate
	Candidate4649_4150320_4150937_-	SF	Ecf	Sigma factor, Ecf family contains 1 Sigma70_r2,1 Sigma70_r4
	Candidate4651_4151522_4152043_-	TR	CsoR	Transcription factor, CsoR family contains 1 DUF156
	Candidate4658_4156792_4157571_-	TR	GntR	Transcription factor, GntR family contains 1 GntR
	Candidate4684_4175346_4176134_+	TR	TetR	Transcription factor, TetR family contains 1 TetR_N
	Candidate4698_4186816_4188471_+	TR	MerR	Transcription factor, MerR family contains 1 MerR-DNA-bind
	Candidate46_39191_40078_+	OCS	LysR	Transcription factor, LysR family contains 1 HTH_1,1 LysR_substrate
	Candidate4702_4191678_4192454_+	TR	DeoR	Transcription factor, DeoR family contains 1 HTH_DeoR,1 DeoR
	Candidate4709_4199383_4200204_+	TR	LuxR	Transcription factor, LuxR family contains 1 HTH_LUXR
	Candidate470_416118_416834_+	TR	TetR	Transcription factor, TetR family contains 1 TetR_N
	Candidate4732_4213198_4214181_-	TR	Unclassified	Transcription factor, Unclassified contains 1 HTH_11
	Candidate4745_4224464_4225207_-	SF	－	Sigma factor, RpoE family contains 1 Sigma70_r2,1 Sigma70_r3,1 Sigma70_r4
	Candidate4764_4242124_4242813_-	RR	OmpR	Response regulator, OmpR family contains 1 Response_reg,1 Trans_reg_C
	Candidate4773_4251104_4251823_-	OCS	LuxR	Transcription factor, LuxR family contains 1 Autoind_bind,1 GerE
	Candidate4787_4261664_4262557_-	OCS	LysR	Transcription factor, LysR family contains 1 HTH_1,1 LysR_substrate
	Candidate4796_4271367_4272272_-	OCS	LysR	Transcription factor, LysR family contains 1 HTH_1,1 LysR_substrate
	Candidate479_425642_426496_+	SF	Ecf	Sigma factor, Ecf family contains 1 Sigma70_r1_2,1 Sigma70_r2,1 Sigma70_r4
	Candidate4807_4283690_4284322_-	TR	TetR	Transcription factor, TetR family contains 1 TetR_N
	Candidate4812_4289085_4290005_+	OCS	LysR	Transcription factor, LysR family contains 1 HTH_1,1 LysR_substrate
	Candidate4824_4298866_4299498_-	RR	NarL	Response regulator, NarL family contains 1 Response_reg,1 HTH_LUXR
	Candidate4832_4304476_4305069_+	TR	TetR	Transcription factor, TetR family contains 1 TetR_N
	Candidate4837_4309301_4309882_-	TR	MarR	Transcription factor, MarR family contains 1 MarR
	Candidate4839_4311734_4312294_-	TR	TetR	Transcription factor, TetR family contains 1 TetR_N
	Candidate4853_4327050_4327970_+	TR	GntR	Transcription factor, GntR family contains 1 GntR
	Candidate4857_4333788_4334759_-	TR	Xre	Transcription factor, Xre family contains 1 HTH_XRE
	Candidate4886_4367456_4368238_-	OCS	AraC	Transcription factor, AraC family contains 1 AraC_binding,2 HTH_AraC
	Candidate4892_4372500_4373306_+	OCS	AraC	Transcription factor, AraC family contains 1 AraC_binding,1 HTH_AraC
	Candidate4895_4374730_4375338_-	TR	TetR	Transcription factor, TetR family contains 1 TetR_N
	Candidate4898_4376942_4377835_+	OCS	LysR	Transcription factor, LysR family contains 1 HTH_1,1 LysR_substrate
	Candidate4917_4401339_4402400_+	OCS	LysR	Transcription factor, LysR family contains 1 HTH_1,1 LysR_substrate
	Candidate4932_4417093_4417983_+	OCS	LysR	Transcription factor, LysR family contains 1 HTH_1,1 LysR_substrate
	Candidate4934_4419704_4420705_+	TR	AraC	Transcription factor, AraC family contains 1 HTH_AraC
	Candidate4937_4425516_4426193_-	RR	OmpR	Response regulator, OmpR family contains 1 Response_reg,1 Trans_reg_C
	Candidate4963_4448126_4448938_-	RR	OmpR	Response regulator, OmpR family contains 1 Response_reg,1 Trans_reg_C
	Candidate4995_4468031_4468984_-	OCS	LysR	Transcription factor, LysR family contains 1 HTH_1,1 LysR_substrate
	Candidate4999_4471557_4472273_+	OCS	GntR	Transcription factor, GntR family contains 1 GntR,1 UTRA
	Candidate5000_4472439_4473341_+	OCS	LysR	Transcription factor, LysR family contains 1 HTH_1,1 LysR_substrate
	Candidate5003_4475351_4476226_-	OCS	LysR	Transcription factor, LysR family contains 1 HTH_1,1 LysR_substrate
	Candidate5005_4477365_4478153_-	OCS	LuxR	Transcription factor, LuxR family contains 1 Autoind_bind,1 HTH_LUXR
	Candidate5014_4483914_4484825_-	OCS	LysR	Transcription factor, LysR family contains 1 HTH_1,1 LysR_substrate
	Candidate5042_4503483_4504262_-	OCS	AraC	Transcription factor, AraC family contains 1 AraC_binding,1 HTH_AraC
	Candidate5053_4513766_4515187_-	RR	NtrC	Response regulator, NtrC family contains 1 Response_reg,1 AAA_5,1 HTH_8
	Candidate5095_4552019_4552933_-	OCS	LysR	Transcription factor, LysR family contains 1 HTH_1,1 LysR_substrate
	Candidate5160_4606415_4607230_+	TR	IclR	Transcription factor, IclR family contains 1 HTH_IclR,1 IclR
	Candidate5178_4618474_4619472_+	OCS	LysR	Transcription factor, LysR family contains 1 HTH_1,1 LysR_substrate
	Candidate522_468037_468831_+	OCS	AraC	Transcription factor, AraC family contains 1 AraC_binding,2 HTH_AraC
	Candidate5273_4674224_4674832_-	TR	MarR	Transcription factor, MarR family contains 1 MarR
	Candidate5290_4688893_4689771_-	RR	OmpR	Response regulator, OmpR family contains 1 Response_reg,1 Trans_reg_C
	Candidate530_476264_476707_-	TR	MarR	Transcription factor, MarR family contains 1 MarR
	Candidate5321_4713032_4713754_+	OCS	LexA	Transcription factor, LexA family contains 1 HTH_XRE,1 Peptidase_S24
	Candidate5338_4728180_4729169_-	TR	AraC	Transcription factor, AraC family contains 2 HTH_AraC
	Candidate5356_4745148_4746095_+	OCS	LysR	Transcription factor, LysR family contains 1 HTH_1,1 LysR_substrate
	Candidate5357_4746229_4747176_-	OCS	LysR	Transcription factor, LysR family contains 1 HTH_1,1 LysR_substrate
	Candidate5376_4760068_4760856_+	OCS	AraC	Transcription factor, AraC family contains 1 AraC_binding,2 HTH_AraC
	Candidate5406_4790578_4791168_-	TR	TetR	Transcription factor, TetR family contains 1 TetR_N
	Candidate5417_4798833_4799852_-	TR	AraC	Transcription factor, AraC family contains 1 HTH_AraC
	Candidate5420_4801995_4802678_-	TR	TetR	Transcription factor, TetR family contains 1 TetR_N
	Candidate542_493688_494308_+	TR	TetR	Transcription factor, TetR family contains 1 TetR_N
	Candidate5459_4820646_4821530_+	OCS	LysR	Transcription factor, LysR family contains 1 HTH_1,1 LysR_substrate
	Candidate5460_4821503_4822456_-	OCS	LysR	Transcription factor, LysR family contains 1 HTH_1,1 LysR_substrate
	Candidate5484_4839661_4840383_+	TR	GntR	Transcription factor, GntR family contains 1 GntR
	Candidate5490_4848150_4848938_-	OCS	AraC	Transcription factor, AraC family contains 1 AraC_binding,1 HTH_AraC
	Candidate5501_4857625_4858554_+	OCS	LysR	Transcription factor, LysR family contains 1 HTH_1,1 LysR_substrate
	Candidate5505_4866361_4867227_-	TR	AraC	Transcription factor, AraC family contains 2 HTH_AraC
	Candidate5526_4883614_4884432_-	SF	Ecf	Sigma factor, Ecf family contains 1 Sigma70_r2,1 Sigma70_r4
	Candidate5552_4908790_4909704_+	OCS	LysR	Transcription factor, LysR family contains 1 HTH_1,1 LysR_substrate
	Candidate555_507617_508525_+	OCS	LysR	Transcription factor, LysR family contains 1 HTH_1,1 LysR_substrate
	Candidate5629_4961020_4961874_+	OCS	LysR	Transcription factor, LysR family contains 1 HTH_1,1 LysR_substrate
	Candidate5640_4970093_4971079_-	OCS	LysR	Transcription factor, LysR family contains 1 HTH_1,1 LysR_substrate
	Candidate5706_5037379_5038182_+	OCS	AraC	Transcription factor, AraC family contains 1 AraC_binding,2 HTH_AraC
	Candidate5715_5047357_5048199_+	RR	NarL	Response regulator, NarL family contains 1 Response_reg,1 HTH_LUXR
	Candidate575_526749_527438_+	RR	OmpR	Response regulator, OmpR family contains 1 Response_reg,1 Trans_reg_C
	Candidate5763_5096729_5097499_-	TR	IclR	Transcription factor, IclR family contains 1 HTH_IclR,1 IclR
	Candidate5779_5111890_5112141_-	TR	FeoC	Transcription factor, FeoC family contains 1 FeoC
	Candidate5786_5118517_5119413_-	OCS	LysR	Transcription factor, LysR family contains 1 HTH_1,1 LysR_substrate
	Candidate5808_5140901_5141629_-	RR	OmpR	Response regulator, OmpR family contains 1 Response_reg,1 Trans_reg_C
	Candidate5838_5169708_5170667_-	TR	CsoR	Transcription factor, CsoR family contains 1 DUF156
	Candidate585_537005_538540_-	SF	Ecf	Sigma factor, Ecf family contains 1 Sigma70_r2,1 Sigma70_r4
	Candidate5874_5197488_5198486_+	OCS	AraC	Transcription factor, AraC family contains 1 DJ-1_PfpI,2 HTH_AraC
	Candidate589_539035_539604_+	TR	TetR	Transcription factor, TetR family contains 1 TetR_N
	Candidate5905_5221744_5223237_+	SF	RpoN	Sigma factor, RpoN family contains 1 Sigma54_AID,1 Sigma54_CBD,1 Sigma54_DBD
	Candidate5939_5257257_5257817_-	RR	PrrA	Response regulator, PrrA family contains 1 Response_reg,1 HTH_8
	Candidate5946_5265110_5265673_+	TR	Xre	Transcription factor, Xre family contains 1 HTH_XRE
	Candidate594_541712_542668_-	OCS	LysR	Transcription factor, LysR family contains 1 HTH_1,1 LysR_substrate
	Candidate5957_5275670_5276143_+	TR	MarR	Transcription factor, MarR family contains 1 MarR,1 AsnC_trans_reg
	Candidate596_543281_544231_-	OCS	LysR	Transcription factor, LysR family contains 1 HTH_1,1 LysR_substrate
	Candidate6007_5324002_5325339_+	RR	PrrA	Response regulator, PrrA family contains 1 Response_reg,1 HTH_8
	Candidate605_551965_552723_-	OCS	LysR	Transcription factor, LysR family contains 1 HTH_1,2 TOBE
	Candidate6067_5377968_5378603_+	TR	TetR	Transcription factor, TetR family contains 1 TetR_N
	Candidate6071_5384486_5385145_+	TR	IclR	Transcription factor, IclR family contains 1 HTH_IclR
	Candidate610_554364_555281_-	OCS	LysR	Transcription factor, LysR family contains 1 HTH_1,1 LysR_substrate
	Candidate6276_5543001_5543708_-	TR	SfsA	Transcription factor, SfsA family contains 1 SfsA
	Candidate6332_5594371_5594775_-	TR	Fur	Transcription factor, Fur family contains 1 FUR
	Candidate6338_5596981_5597754_-	TR	GntR	Transcription factor, GntR family contains 1 GntR
	Candidate6350_5608133_5608798_+	RR	OmpR	Response regulator, OmpR family contains 1 Response_reg,1 Trans_reg_C
	Candidate6352_5610319_5610717_+	TR	MerR	Transcription factor, MerR family contains 1 MerR,1 MerR-DNA-bind
	Candidate6359_5615862_5616329_+	TR	MarR	Transcription factor, MarR family contains 1 MarR,1 AsnC_trans_reg
	Candidate6362_5619615_5620616_-	TR	AraC	Transcription factor, AraC family contains 1 HTH_AraC
	Candidate6381_5634198_5635172_+	TR	LuxR	Transcription factor, LuxR family contains 1 GerE
	Candidate6417_5665159_5665719_+	TR	TetR	Transcription factor, TetR family contains 1 TetR_N
	Candidate6473_5716432_5717244_+	TR	MerR	Transcription factor, MerR family contains 1 MerR,1 MerR-DNA-bind
	Candidate6479_5722930_5723688_+	RR	OmpR	Response regulator, OmpR family contains 1 Response_reg,1 Trans_reg_C
	Candidate6484_5728869_5729582_+	TR	TetR	Transcription factor, TetR family contains 1 TetR_N
	Candidate648_589473_590231_-	OCS	Crp	Transcription factor, Crp family contains 1 cNMP_binding,1 HTH_CRP
	Candidate6490_5733242_5733793_-	SF	Ecf	Sigma factor, Ecf family contains 1 Sigma70_r2,1 Sigma70_r4
	Candidate6497_5743024_5743920_+	OCS	LysR	Transcription factor, LysR family contains 1 HTH_1,1 LysR_substrate
	Candidate649_590510_591388_-	OCS	LysR	Transcription factor, LysR family contains 1 HTH_1,1 LysR_substrate
	Candidate6502_5747668_5748381_-	TR	GntR	Transcription factor, GntR family contains 1 GntR
	Candidate654_594938_596428_+	OCS	LuxR	Transcription factor, LuxR family contains 2 PAS_4,1 PAS,1 HTH_LUXR
	Candidate656_598073_598627_+	TR	Xre	Transcription factor, Xre family contains 1 HTH_XRE
	Candidate6595_5842638_5843375_-	RR	OmpR	Response regulator, OmpR family contains 1 Response_reg,1 Trans_reg_C
	Candidate6596_5843490_5844137_-	TR	TetR	Transcription factor, TetR family contains 1 TetR_N
	Candidate6600_5849464_5850348_-	OCS	LysR	Transcription factor, LysR family contains 1 HTH_1,1 LysR_substrate
	Candidate6645_5903608_5904513_-	OCS	LysR	Transcription factor, LysR family contains 1 HTH_1,1 LysR_substrate
	Candidate6648_5907014_5908147_+	TR	AraC	Transcription factor, AraC family contains 1 HTH_AraC
	Candidate6684_5944417_5945034_+	TR	TetR	Transcription factor, TetR family contains 1 TetR_N
	Candidate670_608320_609321_-	TR	ArsR	Transcription factor, ArsR family contains 1 HTH_5
	Candidate6710_5967837_5968859_+	OCS	LysR	Transcription factor, LysR family contains 1 HTH_1,1 LysR_substrate
	Candidate6735_5992919_5993671_-	OCS	GntR	Transcription factor, GntR family contains 1 GntR,1 UTRA
	Candidate6748_6006472_6006897_+	TR	MerR	Transcription factor, MerR family contains 1 MerR,1 MerR-DNA-bind
	Candidate6758_6017699_6019129_+	RR	NtrC	Response regulator, NtrC family contains 1 Response_reg,1 AAA_5,1 HTH_8
	Candidate6799_6049526_6049996_+	TR	MarR	Transcription factor, MarR family contains 1 MarR
	Candidate6810_6059883_6061271_+	RR	NtrC	Response regulator, NtrC family contains 1 Response_reg,1 AAA_5,1 HTH_8
	Candidate6834_6076748_6077629_+	OCS	LysR	Transcription factor, LysR family contains 1 HTH_1,1 LysR_substrate
	Candidate6847_6088063_6089007_+	OCS	LysR	Transcription factor, LysR family contains 1 HTH_1,1 LysR_substrate
	Candidate6860_6098476_6099219_-	RR	OmpR	Response regulator, OmpR family contains 1 Response_reg,1 Trans_reg_C
	Candidate6879_6121475_6122758_-	OCS	LysR	Transcription factor, LysR family contains 1 HTH_1,1 LysR_substrate
	Candidate687_622921_623832_-	OCS	AraC	Transcription factor, AraC family contains 1 AraC_binding,2 HTH_AraC
	Candidate6930_6168328_6169194_-	RR	LytTR	Response regulator, LytTR family contains 1 Response_reg,1 LytTR
	Candidate6956_6193079_6194455_+	OCS	GntR	Transcription factor, GntR family contains 1 GntR,1 Aminotran_1_2
	Candidate6970_6204192_6205151_-	OCS	LysR	Transcription factor, LysR family contains 1 HTH_1,1 LysR_substrate
	Candidate6980_6215806_6216354_-	TR	Xre	Transcription factor, Xre family contains 1 HTH_XRE
	Candidate700_630686_630886_+	TR	Xre	Transcription factor, Xre family contains 1 HTH_XRE
	Candidate7010_6240561_6242510_-	TR	AraC	Transcription factor, AraC family contains 1 HTH_AraC
	Candidate7031_6257868_6258800_+	OCS	LysR	Transcription factor, LysR family contains 1 HTH_1,1 LysR_substrate
	Candidate7042_6269728_6270483_+	TR	GntR	Transcription factor, GntR family contains 1 GntR
	Candidate7047_6272600_6273289_+	RR	OmpR	Response regulator, OmpR family contains 1 Response_reg,1 Trans_reg_C
	Candidate7087_6296537_6297166_-	TR	TetR	Transcription factor, TetR family contains 1 TetR_N
	Candidate708_636660_637781_-	TR	MarR	Transcription factor, MarR family contains 1 MarR
	Candidate7096_6304492_6305595_+	OCS	AraC	Transcription factor, AraC family contains 1 DJ-1_PfpI,2 HTH_AraC
	Candidate7098_6306159_6307052_-	OCS	LysR	Transcription factor, LysR family contains 1 HTH_1,1 LysR_substrate
	Candidate7120_6328675_6328881_+	TR	Xre	Transcription factor, Xre family contains 1 HTH_XRE
	Candidate712_642270_644123_-	SF	－	Sigma factor, RpoE family contains 1 Sigma70_r1_1,1 Sigma70_r1_2,1 Sigma70_ner, 1 Sigma70_r2,1 Sigma70_r3,1 Sigma70_r4
	Candidate7154_6353973_6354881_-	OCS	LysR	Transcription factor, LysR family contains 1 HTH_1,1 LysR_substrate
	Candidate7160_6358096_6359571_-	OCS	GntR	Transcription factor, GntR family contains 1 GntR,1 Aminotran_1_2
	Candidate7166_6365734_6366693_+	OCS	LysR	Transcription factor, LysR family contains 1 HTH_1,1 LysR_substrate
	Candidate7219_6404740_6405906_+	TR	Xre	Transcription factor, Xre family contains 1 HTH_3
	Candidate7231_6410991_6411359_+	TR	Mor	Transcription factor, Mor family contains 1 Mor
	Candidate7281_6458874_6460223_+	RR	NtrC	Response regulator, NtrC family contains 1 Response_reg,1 AAA_5,1 HTH_8
	Candidate7300_6477920_6478423_+	TR	Fur	Transcription factor, Fur family contains 1 FUR
	Candidate7309_6483796_6484653_+	OCS	RpiR	Transcription factor, RpiR family contains 1 HTH_6,1 SIS
	Candidate7314_6488845_6490188_-	RR	NtrC	Response regulator, NtrC family contains 1 Response_reg,1 AAA,1 HTH_8
	Candidate7330_6503901_6504581_+	TR	GntR	Transcription factor, GntR family contains 1 GntR
	Candidate7359_6530912_6531487_-	TR	DeoR	Transcription factor, DeoR family contains 1 HTH_DeoR
	Candidate738_670666_671313_+	RR	NarL	Response regulator, NarL family contains 1 Response_reg,1 HTH_LUXR
	Candidate74_63037_63420_-	TR	Xre	Transcription factor, Xre family contains 1 HTH_3
	Candidate750_680986_681765_-	OCS	LexA	Transcription factor, LexA family contains 1 HTH_XRE,1 Peptidase_S24
	Candidate778_699940_700584_-	OCS	Crp	Transcription factor, Crp family contains 1 cNMP_binding,1 HTH_CRP
	Candidate824_721327_722265_+	TR	Unclassified	Transcription factor, Unclassified contains 1 HTH_11
	Candidate86_70621_71541_-	OCS	LysR	Transcription factor, LysR family contains 1 HTH_1,1 LysR_substrate
	Candidate891_767546_768436_+	TR	AraC	Transcription factor, AraC family contains 1 HTH_AraC
	Candidate918_805693_806547_-	OCS	LysR	Transcription factor, LysR family contains 1 HTH_1,1 LysR_substrate
	Candidate926_816006_816650_+	RR	NarL	Response regulator, NarL family contains 1 Response_reg,1 HTH_LUXR
	Candidate938_827613_828362_-	TR	GntR	Transcription factor, GntR family contains 1 GntR
	Candidate940_828648_829670_+	OCS	AraC	Transcription factor, AraC family contains 1 DJ-1_PfpI,2 HTH_AraC
	Candidate956_838881_839804_-	OCS	LysR	Transcription factor, LysR family contains 1 HTH_1,1 LysR_substrate
	Candidate961_842913_843341_+	TR	Rrf2	Transcription factor, Rrf2 family contains 1 Rrf2
	Candidate968_847632_849122_+	OCS	GntR	Transcription factor, GntR family contains 1 GntR,1 Aminotran_1_2
	Candidate976_856183_857001_-	TR	IclR	Transcription factor, IclR family contains 1 HTH_IclR,1 IclR
	Candidate989_870986_872233_-	OCS	LysR	Transcription factor, LysR family contains 1 HTH_1,1 LysR_substrate
