# Supplementary material for: Comparative genomics and DNA methylation analysis of Pseudomonas aeruginosa clinical isolate PA3 by single-molecule real-time sequencing reveals new targets for antimicrobials
Source: Frontiers journal article supplement (doi:10.3389/fcimb.2023.1180194), 2023-08-18
Supplement: Table_5.xls [file Table_5.xls]

## Sheet: Sheet2
	Secretory proteins of P. aeruginosa PA3										Note：The title line indicates (left to right)：secretory protein ID, predicted results, other (not secretory protein), Sec signal peptide (Sec/SPI), Lipoprotein signal peptide (Sec/SPII), Tat signal peptide (Tat/SPI), Tat lipoprotein signal peptide (Tat/SPII), Pilin signal peptide (Sec/SPIII), cleavage site of protein sequence (including cleavage site and probability).
	ID	Prediction	Other	SP(Sec/SPI)	LIPO (Sec/SPII)	TAT (Tat/SPI)	TATLIPO (Tat/SPII)	PILIN (Sec/SPIII)	CS Position
	PA3_00007_hypothetical_protein	SP	0.000291	0.998973	0.000183	0.000212	0.000179	0.000155	CS pos: 26-27. Pr: 0.9743
	PA3_00020_hypothetical_protein	SP	0.000262	0.999039	0.000177	0.000172	0.000162	0.000141	CS pos: 19-20. Pr: 0.9773
	PA3_00026_hypothetical_protein	SP	0.000258	0.999003	0.000262	0.000158	0.000153	0.000143	CS pos: 22-23. Pr: 0.9745
	PA3_00027_hypothetical_protein	SP	0.010508	0.982359	0.00617	0.000392	0.00028	0.000262	CS pos: 30-31. Pr: 0.9507
	PA3_00030_Glycine_betaine-binding_protein_OpuAC	SP	0.000311	0.998923	0.000267	0.000168	0.00015	0.000143	CS pos: 22-23. Pr: 0.9686
	PA3_00040_hypothetical_protein	SP	0.000367	0.99887	0.000245	0.000166	0.000166	0.000155	CS pos: 19-20. Pr: 0.9713
	PA3_00041_Hemolysin_transporter_protein_ShlB	SP	0.000209	0.999172	0.000148	0.000157	0.000139	0.000136	CS pos: 19-20. Pr: 0.9785
	PA3_00042_16S_rRNA_endonuclease_CdiA	SP	0.000327	0.999026	0.00017	0.000164	0.000144	0.000136	CS pos: 28-29. Pr: 0.8860
	PA3_00045_hypothetical_protein	LIPO	0	1e-06	1.00002	0	0	0	CS pos: 20-21. Pr: 0.9928
	PA3_00048_Putative_lipoprotein_NMB1164	LIPO	0	1e-06	1.00003	0	0	0	CS pos: 23-24. Pr: 0.9942
	PA3_00049_hypothetical_protein	LIPO	0	0	1.00009	0	0	0	CS pos: 19-20. Pr: 0.9952
	PA3_00050_Putative_lipoprotein_NMB1162	LIPO	0	0	1.00005	0	0	0	CS pos: 21-22. Pr: 0.9969
	PA3_00052_hypothetical_protein	SP	0.000437	0.998828	0.000195	0.000217	0.000164	0.000149	CS pos: 28-29. Pr: 0.9708
	PA3_00053_hypothetical_protein	SP	0.001208	0.98849	0.009302	0.000418	0.000286	0.000269	CS pos: 21-22. Pr: 0.9599
	PA3_00054_hypothetical_protein	SP	0.000423	0.998516	0.000265	0.000294	0.000242	0.000233	CS pos: 20-21. Pr: 0.9746
	PA3_00060_hypothetical_protein	SP	0.000623	0.998405	0.000239	0.000274	0.000229	0.000199	CS pos: 24-25. Pr: 0.9759
	PA3_00063_hypothetical_protein	SP	0.000267	0.999115	0.000148	0.000162	0.000147	0.00014	CS pos: 19-20. Pr: 0.9797
	PA3_00064_hypothetical_protein	LIPO	0	0	1.00008	0	0	0	CS pos: 17-18. Pr: 0.9959
	PA3_00065_hypothetical_protein	LIPO	0	0	1.00005	0	0	0	CS pos: 15-16. Pr: 0.9961
	PA3_00066_hypothetical_protein	LIPO	0.002559	0.421557	0.575822	3.2e-05	1.3e-05	3e-06	CS pos: 44-45. Pr: 0.9364
	PA3_00073_hypothetical_protein	LIPO	4.2e-05	0.000442	0.99953	7e-06	2e-06	1e-06	CS pos: 29-30. Pr: 0.9950
	PA3_00074_hypothetical_protein	SP	0.000258	0.999061	0.000184	0.000183	0.000154	0.000139	CS pos: 23-24. Pr: 0.9780
	PA3_00083_hypothetical_protein	LIPO	0	0	1.00007	0	0	0	CS pos: 15-16. Pr: 0.9966
	PA3_00131_hypothetical_protein	LIPO	0	4e-06	1.00003	0	0	0	CS pos: 19-20. Pr: 0.9931
	PA3_00132_hypothetical_protein	LIPO	0	1e-06	1.00007	0	0	0	CS pos: 22-23. Pr: 0.9962
	PA3_00148_Pyrimidine-specific_ribonucleoside_hydrolase_RihB	SP	0.000979	0.998158	0.000238	0.000222	0.000179	0.000165	CS pos: 30-31. Pr: 0.9571
	PA3_00149_hypothetical_protein	TAT	0	0	0	0.999972	1.6e-05	0	CS pos: 35-36. Pr: 0.9103
	PA3_00151_Purine-binding_protein	SP	0.001575	0.722227	0.274141	0.001398	0.000379	0.000261	CS pos: 31-32. Pr: 0.6607
	PA3_00156_Ferric-pseudobactin_BN7_BN8_receptor	SP	0.000913	0.519469	0.478534	0.00057	0.000289	0.000203	CS pos: 28-29. Pr: 0.5022
	PA3_00162_Multidrug_resistance_protein_MdtA	LIPO	0	0	1.00005	0	0	0	CS pos: 14-15. Pr: 0.9963
	PA3_00163_Multidrug_resistance_protein_MdtE	LIPO	0	0	1.00007	0	0	0	CS pos: 18-19. Pr: 0.9978
	PA3_00166_hypothetical_protein	SP	0.000319	0.998789	0.000248	0.000216	0.000205	0.000185	CS pos: 24-25. Pr: 0.9725
	PA3_00167_Porin_D	SP	0.18014	0.808531	0.005089	0.001875	0.001245	0.003094	CS pos: 22-23. Pr: 0.8010
	PA3_00191_Putative_aliphatic_sulfonates-binding_protein	SP	0.009662	0.989188	0.000351	0.000342	0.00022	0.00021	CS pos: 30-31. Pr: 0.9340
	PA3_00194_Porin_D	SP	0.095004	0.896407	0.004652	0.001745	0.000896	0.001271	CS pos: 23-24. Pr: 0.8678
	PA3_00195_Major_phosphate-irrepressible_acid_phosphatase	SP	0.000414	0.998644	0.000477	0.000158	0.00015	0.000148	CS pos: 24-25. Pr: 0.9738
	PA3_00197_Pesticin_receptor	SP	0.016668	0.980668	0.001752	0.000376	0.000259	0.000238	CS pos: 35-36. Pr: 0.9409
	PA3_00209_Spermidine-binding_periplasmic_protein_SpuE	SP	0.000275	0.999071	0.000168	0.000185	0.000154	0.000141	CS pos: 22-23. Pr: 0.9742
	PA3_00224_hypothetical_protein	LIPO	0	0	1.00007	0	0	0	CS pos: 18-19. Pr: 0.9975
	PA3_00229_Spermidine_putrescine-binding_periplasmic_protein	SP	0.000774	0.998115	0.000327	0.000286	0.00024	0.000224	CS pos: 28-29. Pr: 0.9599
	PA3_00241_hypothetical_protein	SP	0.001009	0.997766	0.000276	0.000327	0.000302	0.000292	CS pos: 22-23. Pr: 0.9693
	PA3_00247_Porin-like_protein_NicP	SP	0.274764	0.717959	0.003501	0.001311	0.000915	0.001538	CS pos: 29-30. Pr: 0.4063
	PA3_00259_hypothetical_protein	LIPO	0.000313	0.123878	0.875461	0.000149	0.000116	8.4e-05	CS pos: 19-20. Pr: 0.8493
	PA3_00266_hypothetical_protein	LIPO	0.000528	0.380539	0.618352	0.000247	0.000171	0.000154	CS pos: 16-17. Pr: 0.5952
	PA3_00269_hypothetical_protein	SP	0.000236	0.999124	0.000154	0.000165	0.000141	0.00013	CS pos: 21-22. Pr: 0.5885
	PA3_00281_hypothetical_protein	SP	0.00053	0.99842	0.00025	0.000288	0.000253	0.000216	CS pos: 23-24. Pr: 0.4658
	PA3_00285_hypothetical_protein	SP	0.000199	0.999183	0.000147	0.000156	0.000139	0.000136	CS pos: 23-24. Pr: 0.9761
	PA3_00288_Metalloprotease_LoiP	LIPO	0	0	1.00004	0	0	0	CS pos: 19-20. Pr: 0.9921
	PA3_00294_Sulfate-binding_protein	SP	0.000773	0.997933	0.000293	0.00044	0.00028	0.000239	CS pos: 22-23. Pr: 0.9674
	PA3_00302_Porin-like_protein_NicP	SP	0.044007	0.952345	0.001094	0.000919	0.000724	0.000893	CS pos: 29-30. Pr: 0.9235
	PA3_00306_Putrescine-binding_periplasmic_protein_SpuD	SP	0.000227	0.999154	0.000165	0.000158	0.000146	0.000135	CS pos: 19-20. Pr: 0.9790
	PA3_00311_Putrescine-binding_periplasmic_protein_SpuD	SP	0.000343	0.998847	0.00022	0.000218	0.000187	0.000155	CS pos: 24-25. Pr: 0.9699
	PA3_00312_Spermidine-binding_periplasmic_protein_SpuE	SP	0.000258	0.99906	0.00018	0.000177	0.000166	0.000144	CS pos: 24-25. Pr: 0.9756
	PA3_00318_hypothetical_protein	SP	0.000345	0.998893	0.000242	0.000164	0.000162	0.000152	CS pos: 19-20. Pr: 0.9733
	PA3_00321_hypothetical_protein	SP	0.000225	0.999144	0.000169	0.000156	0.000151	0.000147	CS pos: 18-19. Pr: 0.9771
	PA3_00323_hypothetical_protein	SP	0.000725	0.998403	0.000213	0.000272	0.000204	0.000194	CS pos: 23-24. Pr: 0.9599
	PA3_00327_L-cystine-binding_protein_FliY	SP	0.000281	0.999026	0.00021	0.000164	0.000153	0.000141	CS pos: 20-21. Pr: 0.9735
	PA3_00328_hypothetical_protein	SP	0.000311	0.999001	0.000171	0.00019	0.000168	0.000152	CS pos: 23-24. Pr: 0.9689
	PA3_00333_hypothetical_protein	SP	0.000348	0.998912	0.000227	0.000194	0.000167	0.000153	CS pos: 21-22. Pr: 0.9762
	PA3_00336_Spermidine-binding_periplasmic_protein_SpuE	SP	0.000204	0.99915	0.000164	0.000168	0.000153	0.000137	CS pos: 23-24. Pr: 0.9739
	PA3_00361_hypothetical_protein	SP	0.002074	0.996543	0.000551	0.000289	0.000269	0.000237	CS pos: 20-21. Pr: 0.9672
	PA3_00362_Glycerophosphodiester_phosphodiesterase,_periplasmic	SP	0.000582	0.998181	0.00052	0.000292	0.000208	0.000186	CS pos: 27-28. Pr: 0.9667
	PA3_00364_hypothetical_protein	SP	0.002519	0.986961	0.009265	0.000645	0.000311	0.000256	CS pos: 22-23. Pr: 0.9405
	PA3_00375_Secretory_immunoglobulin_A-binding_protein_EsiB	SP	0.000426	0.998821	0.000238	0.000178	0.000174	0.000169	CS pos: 21-22. Pr: 0.9740
	PA3_00376_Gamma-glutamyltranspeptidase	SP	0.000395	0.998759	0.000282	0.000204	0.000182	0.00016	CS pos: 26-27. Pr: 0.9759
	PA3_00380_hypothetical_protein	TATLIPO	0	0	2e-06	0.001064	0.998946	0	CS pos: 38-39. Pr: 0.8111
	PA3_00389_putative_zinc_protease	SP	0.000779	0.930982	0.065821	0.001755	0.000365	0.000258	CS pos: 24-25. Pr: 0.8992
	PA3_00400_hypothetical_protein	SP	0.003007	0.509665	0.486464	0.000421	0.000235	0.000191	CS pos: 19-20. Pr: 0.3174
	PA3_00405_hypothetical_protein	SP	0.000241	0.999096	0.000185	0.000155	0.000161	0.000146	CS pos: 19-20. Pr: 0.9780
	PA3_00439_Pseudooxynicotine_oxidase	SP	0.00045	0.998695	0.000274	0.000181	0.000196	0.000172	CS pos: 23-24. Pr: 0.9720
	PA3_00441_hypothetical_protein	SP	0.000515	0.998167	0.000377	0.000327	0.000303	0.000272	CS pos: 23-24. Pr: 0.9722
	PA3_00443_Multidrug_resistance_protein_MexA	LIPO	0	1e-06	1.00005	0	0	0	CS pos: 23-24. Pr: 0.9961
	PA3_00445_Outer_membrane_protein_OprM	LIPO	0	0	1.00006	0	0	0	CS pos: 17-18. Pr: 0.9965
	PA3_00452_putative_TonB-dependent_receptor_BfrD	SP	0.001149	0.996747	0.000996	0.000551	0.000291	0.000222	CS pos: 28-29. Pr: 0.9614
	PA3_00469_hypothetical_protein	SP	0.000216	0.999184	0.000156	0.000141	0.000131	0.000128	CS pos: 18-19. Pr: 0.9675
	PA3_00473_hypothetical_protein	SP	0.001869	0.630249	0.366174	0.001069	0.000368	0.000247	CS pos: 26-27. Pr: 0.5841
	PA3_00477_hypothetical_protein	SP	0.000249	0.999109	0.000149	0.000178	0.000145	0.00014	CS pos: 22-23. Pr: 0.9667
	PA3_00479_hypothetical_protein	SP	0.000408	0.998717	0.000221	0.000226	0.000203	0.000184	CS pos: 17-18. Pr: 0.9761
	PA3_00486_Virginiamycin_B_lyase	SP	0.00029	0.999041	0.000171	0.000179	0.000152	0.000136	CS pos: 23-24. Pr: 0.9734
	PA3_00488_Ferrichrome-iron_receptor	SP	0.000356	0.998874	0.000205	0.000198	0.000169	0.000156	CS pos: 26-27. Pr: 0.9747
	PA3_00506_hypothetical_protein	LIPO	1e-06	1e-06	1.00003	0	0	0	CS pos: 14-15. Pr: 0.9935
	PA3_00516_hypothetical_protein	SP	0.000254	0.999132	0.000148	0.000161	0.000142	0.000136	CS pos: 22-23. Pr: 0.9756
	PA3_00527_Nitrite_reductase	SP	0.000217	0.999196	0.000151	0.000147	0.000138	0.000132	CS pos: 18-19. Pr: 0.9816
	PA3_00534_hypothetical_protein	LIPO	0	0	1.00005	0	0	0	CS pos: 16-17. Pr: 0.9965
	PA3_00535_hypothetical_protein	SP	0.000281	0.999091	0.000148	0.000159	0.000141	0.000134	CS pos: 31-32. Pr: 0.9693
	PA3_00536_Cytochrome_c-551	SP	0.000231	0.999138	0.00018	0.000153	0.000146	0.000135	CS pos: 22-23. Pr: 0.9737
	PA3_00537_Nitrite_reductase	SP	0.000313	0.998909	0.000186	0.000204	0.000177	0.000162	CS pos: 25-26. Pr: 0.9720
	PA3_00556_hypothetical_protein	LIPO	0	0	1.00005	0	0	0	CS pos: 19-20. Pr: 0.9963
	PA3_00560_Cytochrome_c_	LIPO	0	0	1.00005	0	0	0	CS pos: 18-19. Pr: 0.9967
	PA3_00561_hypothetical_protein	SP	0.000373	0.998931	0.000215	0.000157	0.000155	0.000151	CS pos: 23-24. Pr: 0.8395
	PA3_00572_hypothetical_protein	LIPO	0.000257	0.057988	0.941477	0.000107	9.1e-05	6.3e-05	CS pos: 17-18. Pr: 0.9183
	PA3_00573_hypothetical_protein	LIPO	0	0	1.00004	0	0	0	CS pos: 20-21. Pr: 0.9964
	PA3_00575_hypothetical_protein	LIPO	0	0	1.00005	0	0	0	CS pos: 15-16. Pr: 0.9956
	PA3_00590_Immunomodulating_metalloprotease	SP	0.001742	0.996957	0.000521	0.000313	0.000236	0.000193	CS pos: 26-27. Pr: 0.9613
	PA3_00609_hypothetical_protein	LIPO	0	0	1.00004	0	0	0	CS pos: 15-16. Pr: 0.9959
	PA3_00618_Chaperone_SurA	SP	0.0012	0.855054	0.142755	0.000399	0.000308	0.000263	CS pos: 25-26. Pr: 0.8328
	PA3_00619_LPS-assembly_protein_LptD	SP	0.000775	0.998208	0.000227	0.000374	0.000202	0.000176	CS pos: 33-34. Pr: 0.9451
	PA3_00623_hypothetical_protein	SP	0.002556	0.994173	0.002597	0.000256	0.000191	0.00017	CS pos: 30-31. Pr: 0.9608
	PA3_00624_Signal_transduction_histidine-protein_kinase_phosphatase_DegS	SP	0.000405	0.998786	0.00023	0.000186	0.000186	0.000155	CS pos: 20-21. Pr: 0.9757
	PA3_00626_Spermidine_putrescine-binding_periplasmic_protein	SP	0.000384	0.998879	0.000192	0.00018	0.000164	0.000151	CS pos: 22-23. Pr: 0.9724
	PA3_00628_Spermidine_putrescine-binding_periplasmic_protein	SP	0.000669	0.611748	0.386757	0.000299	0.000272	0.00024	CS pos: 27-28. Pr: 0.5401
	PA3_00656_hypothetical_protein	LIPO	0	1e-06	1.00008	0	0	0	CS pos: 14-15. Pr: 0.9960
	PA3_00675_Murein_DD-endopeptidase_MepM	SP	0.330106	0.662995	0.004329	0.001064	0.000667	0.000819	CS pos: 41-42. Pr: 0.6332
	PA3_00745_Fe_3__-pyochelin_receptor	SP	0.010354	0.987806	0.000957	0.000456	0.000213	0.000185	CS pos: 38-39. Pr: 0.9000
	PA3_00758_Solvent_efflux_pump_outer_membrane_protein_SrpC	LIPO	0	1.3e-05	1.00004	0	0	0	CS pos: 23-24. Pr: 0.9839
	PA3_00762_6-phosphogluconolactonase	SP	0.000303	0.998949	0.000192	0.000195	0.000176	0.000162	CS pos: 24-25. Pr: 0.9670
	PA3_00771_ABC_transporter_glutamine-binding_protein_GlnH	SP	0.000267	0.99902	0.000197	0.00017	0.000168	0.000153	CS pos: 23-24. Pr: 0.9765
	PA3_00787_Porin-like_protein_NicP	SP	0.004281	0.992547	0.002013	0.000473	0.00035	0.000287	CS pos: 31-32. Pr: 0.9327
	PA3_00791_Lysyl_endopeptidase	SP	0.000519	0.998328	0.00045	0.00027	0.00022	0.000194	CS pos: 24-25. Pr: 0.9632
	PA3_00798_Ferripyoverdine_receptor	SP	0.000295	0.999015	0.000174	0.000187	0.00016	0.000146	CS pos: 22-23. Pr: 0.9654
	PA3_00807_Ferrienterobactin-binding_periplasmic_protein	SP	0.001534	0.992357	0.005313	0.000364	0.000216	0.000179	CS pos: 25-26. Pr: 0.9477
	PA3_00810_Pesticin_receptor	SP	0.000484	0.998598	0.000314	0.000228	0.000186	0.000149	CS pos: 29-30. Pr: 0.9679
	PA3_00822_Outer_membrane_protein_OprM	SP	0.000241	0.999112	0.000151	0.000172	0.000154	0.000148	CS pos: 20-21. Pr: 0.9758
	PA3_00826_hypothetical_protein	TAT	6e-06	7e-06	2e-06	0.981531	0.01844	0	CS pos: 54-55. Pr: 0.8471
	PA3_00829_Porin-like_protein_NicP	SP	0.34977	0.635442	0.006218	0.002594	0.001945	0.00401	CS pos: 27-28. Pr: 0.6143
	PA3_00848_hypothetical_protein	SP	0.000748	0.916496	0.081963	0.000281	0.00025	0.000228	CS pos: 23-24. Pr: 0.8840
	PA3_00856_Beta-lactamase	SP	0.000373	0.998867	0.000197	0.00021	0.000169	0.000156	CS pos: 26-27. Pr: 0.9741
	PA3_00860_hypothetical_protein	SP	0.000876	0.998341	0.000193	0.000222	0.000171	0.000164	CS pos: 31-32. Pr: 0.9685
	PA3_00867_hypothetical_protein	SP	0.000255	0.999001	0.000158	0.000211	0.000168	0.000155	CS pos: 23-24. Pr: 0.7940
	PA3_00869_Porin_B	SP	0.000233	0.999092	0.000188	0.000167	0.00015	0.000139	CS pos: 22-23. Pr: 0.9781
	PA3_00882_putative_major_fimbrial_subunit_LpfA	SP	0.000267	0.999057	0.000172	0.000187	0.000165	0.000146	CS pos: 37-38. Pr: 0.9744
	PA3_00883_putative_fimbrial_chaperone_YadV	SP	0.000495	0.995917	0.002715	0.000454	0.000208	0.000174	CS pos: 28-29. Pr: 0.9653
	PA3_00884_Outer_membrane_usher_protein_HtrE	SP	0.094082	0.502926	0.400674	0.000482	0.001323	0.000513	CS pos: 50-51. Pr: 0.2156
	PA3_00885_putative_fimbrial_chaperone_YadV	SP	0.023914	0.974647	0.000591	0.000257	0.000254	0.000315	CS pos: 25-26. Pr: 0.9071
	PA3_00886_Heme_hemopexin-binding_protein	SP	0.132774	0.828884	0.036192	0.001449	0.000385	0.000298	CS pos: 53-54. Pr: 0.7106
	PA3_00887_hypothetical_protein	SP	0.001265	0.997861	0.000301	0.000231	0.000164	0.000164	CS pos: 38-39. Pr: 0.9462
	PA3_00902_Outer_membrane_protein_W	SP	0.004744	0.990826	0.00147	0.000974	0.000913	0.001049	CS pos: 22-23. Pr: 0.9383
	PA3_00903_hypothetical_protein	SP	0.000199	0.999205	0.000149	0.000154	0.000137	0.000128	CS pos: 23-24. Pr: 0.9194
	PA3_00906_hypothetical_protein	SP	0.000235	0.999066	0.000186	0.000174	0.000155	0.000145	CS pos: 17-18. Pr: 0.9794
	PA3_00910_hypothetical_protein	LIPO	0	0	1.00003	0	0	0	CS pos: 16-17. Pr: 0.9957
	PA3_00919_hypothetical_protein	SP	0.000218	0.999135	0.000167	0.000148	0.00014	0.000138	CS pos: 19-20. Pr: 0.9754
	PA3_00920_hypothetical_protein	SP	0.000345	0.998951	0.000177	0.000173	0.000163	0.000151	CS pos: 19-20. Pr: 0.9751
	PA3_00923_Vitamin_B12-binding_protein	SP	0.001774	0.99734	0.000323	0.00019	0.000166	0.000174	CS pos: 18-19. Pr: 0.9602
	PA3_00933_hypothetical_protein	SP	0.000985	0.997888	0.000218	0.000486	0.000202	0.000175	CS pos: 33-34. Pr: 0.9677
	PA3_00941_hypothetical_protein	SP	0.000848	0.998167	0.000325	0.000239	0.000197	0.000189	CS pos: 24-25. Pr: 0.9619
	PA3_00951_hypothetical_protein	LIPO	2.4e-05	0.015375	0.984608	6e-06	8e-06	6e-06	CS pos: 12-13. Pr: 0.9729
	PA3_00953_hypothetical_protein	LIPO	0	0	1.00005	0	0	0	CS pos: 20-21. Pr: 0.9947
	PA3_00968_Membrane-bound_lytic_murein_transglycosylase_B	SP	0.000993	0.998101	0.000248	0.000224	0.000208	0.000198	CS pos: 29-30. Pr: 0.9616
	PA3_00969_Endolytic_peptidoglycan_transglycosylase_RlpA	LIPO	0	6e-06	1.00004	0	0	0	CS pos: 26-27. Pr: 0.9923
	PA3_00970_D-alanyl-D-alanine_carboxypeptidase_DacC	SP	0.000361	0.99887	0.00021	0.000191	0.000179	0.000149	CS pos: 24-25. Pr: 0.9783
	PA3_00976_Membrane-bound_lytic_murein_transglycosylase_B	LIPO	0.000979	0.035041	0.465029	0.137566	0.361081	0.00029	CS pos: 30-31. Pr: 0.4435
	PA3_00980_LPS-assembly_lipoprotein_LptE	LIPO	0	0	1.00005	0	0	0	CS pos: 19-20. Pr: 0.9957
	PA3_00990_Secretory_immunoglobulin_A-binding_protein_EsiB	SP	0.000278	0.99903	0.000203	0.000165	0.000153	0.000146	CS pos: 23-24. Pr: 0.9774
	PA3_01000_hypothetical_protein	LIPO	1.4e-05	0.002221	0.9978	2e-06	6e-06	3e-06	CS pos: 17-18. Pr: 0.9841
	PA3_01006_hypothetical_protein	SP	0.000435	0.998675	0.000335	0.000179	0.000172	0.000165	CS pos: 24-25. Pr: 0.9390
	PA3_01011_hypothetical_protein	SP	0.000241	0.999064	0.000166	0.000172	0.000152	0.000146	CS pos: 25-26. Pr: 0.9760
	PA3_01032_Taurine-binding_periplasmic_protein	SP	0.000329	0.998742	0.000225	0.000263	0.000236	0.000196	CS pos: 25-26. Pr: 0.9628
	PA3_01039_Methionine-binding_lipoprotein_MetQ	SP	0.000297	0.99902	0.000186	0.000163	0.000156	0.000145	CS pos: 20-21. Pr: 0.9694
	PA3_01047_hypothetical_protein	SP	0.000797	0.998046	0.000256	0.000379	0.000259	0.000233	CS pos: 29-30. Pr: 0.9629
	PA3_01048_hypothetical_protein	SP	0.000237	0.999094	0.000171	0.000164	0.000152	0.000146	CS pos: 24-25. Pr: 0.9777
	PA3_01060_Alkaline_phosphatase_D	TAT	0	0	0	1.00002	2e-06	0	CS pos: 31-32. Pr: 0.9362
	PA3_01061_hypothetical_protein	SP	0.000289	0.998915	0.000218	0.000187	0.00018	0.000173	CS pos: 23-24. Pr: 0.9757
	PA3_01068_Inhibitor_of_vertebrate_lysozyme	SP	0.000247	0.999112	0.000175	0.000165	0.00015	0.000135	CS pos: 24-25. Pr: 0.9771
	PA3_01069_Fe_3___dicitrate_transport_protein_FecA	SP	0.008155	0.899712	0.089908	0.001433	0.000404	0.000355	CS pos: 32-33. Pr: 0.8437
	PA3_01076_Solvent_efflux_pump_outer_membrane_protein_SrpC	LIPO	1e-06	1.1e-05	1.00003	0	0	0	CS pos: 27-28. Pr: 0.9929
	PA3_01082_Osmoprotectant-binding_protein_OsmX	SP	0.000611	0.996794	0.001865	0.000249	0.000236	0.000221	CS pos: 23-24. Pr: 0.9675
	PA3_01088_hypothetical_protein	SP	0.000458	0.998712	0.000311	0.000196	0.000172	0.000149	CS pos: 28-29. Pr: 0.9702
	PA3_01108_Lysine_arginine_ornithine-binding_periplasmic_protein	SP	0.000349	0.998878	0.000196	0.000202	0.000178	0.000159	CS pos: 26-27. Pr: 0.9717
	PA3_01115_Putative_amino-acid_ABC_transporter-binding_protein_YhdW	SP	0.000218	0.999184	0.000148	0.000155	0.000142	0.000129	CS pos: 24-25. Pr: 0.9310
	PA3_01137_hypothetical_protein	SP	0.000386	0.998813	0.000264	0.000196	0.000158	0.000149	CS pos: 27-28. Pr: 0.9687
	PA3_01169_hypothetical_protein	LIPO	0	0	1.00004	0	0	0	CS pos: 17-18. Pr: 0.9967
	PA3_01174_Outer_membrane_protein_assembly_factor_BamB	LIPO	0	1e-06	1.00005	0	0	0	CS pos: 18-19. Pr: 0.9961
	PA3_01178_hypothetical_protein	SP	0.463316	0.531801	0.001475	0.001446	0.000777	0.001179	CS pos: 44-45. Pr: 0.3194
	PA3_01183_hypothetical_protein	SP	0.38074	0.617151	0.000782	0.00056	0.000302	0.000452	CS pos: 29-30. Pr: 0.6020
	PA3_01187_Murein_DD-endopeptidase_MepM	SP	0.00062	0.982578	0.016067	0.000268	0.000231	0.000207	CS pos: 23-24. Pr: 0.9527
	PA3_01188_hypothetical_protein	SP	0.000298	0.999126	0.000143	0.000149	0.000135	0.000131	CS pos: 28-29. Pr: 0.9775
	PA3_01189_hypothetical_protein	SP	0.000239	0.999099	0.00018	0.00017	0.000159	0.000142	CS pos: 20-21. Pr: 0.9618
	PA3_01196_Solute-binding_protein	SP	0.000397	0.998808	0.000199	0.000223	0.000191	0.000159	CS pos: 31-32. Pr: 0.9700
	PA3_01203_hypothetical_protein	SP	0.000375	0.998974	0.000179	0.000176	0.000154	0.000148	CS pos: 31-32. Pr: 0.9656
	PA3_01210_Multicopper_oxidase_mco	TAT	0	0	0	0.999985	2e-06	0	CS pos: 35-36. Pr: 0.5430
	PA3_01214_Membrane-bound_lytic_murein_transglycosylase_F	LIPO	1e-06	1.8e-05	1.00004	0	0	0	CS pos: 26-27. Pr: 0.9952
	PA3_01223_hypothetical_protein	SP	0.000197	0.999249	0.00014	0.000144	0.000131	0.000125	CS pos: 20-21. Pr: 0.8868
	PA3_01242_Thiol_disulfide_interchange_protein_DsbC	SP	0.000282	0.998958	0.000219	0.000186	0.000176	0.000163	CS pos: 21-22. Pr: 0.9776
	PA3_01256_Elastase	SP	0.00025	0.999074	0.000165	0.000167	0.000154	0.000145	CS pos: 23-24. Pr: 0.9757
	PA3_01263_hypothetical_protein	LIPO	0	4e-06	1.00006	0	0	0	CS pos: 23-24. Pr: 0.9947
	PA3_01264_hypothetical_protein	SP	0.000359	0.998952	0.000192	0.000166	0.000156	0.000153	CS pos: 24-25. Pr: 0.9728
	PA3_01266_hypothetical_protein	TAT	0	0	0	0.999989	0	0	CS pos: 28-29. Pr: 0.9270
	PA3_01281_hypothetical_protein	LIPO	0	0	1.00005	0	0	0	CS pos: 17-18. Pr: 0.9903
	PA3_01284_hypothetical_protein	LIPO	0	0	1.00004	0	0	0	CS pos: 18-19. Pr: 0.9965
	PA3_01287_Outer_membrane_porin_F	LIPO	0	0	1.00006	0	0	0	CS pos: 19-20. Pr: 0.9966
	PA3_01288_hypothetical_protein	LIPO	0.000217	0.002978	0.996771	3.2e-05	1e-05	2e-06	CS pos: 32-33. Pr: 0.9957
	PA3_01302_Multidrug_resistance_protein_MdtA	LIPO	0	0	1.00005	0	0	0	CS pos: 20-21. Pr: 0.9942
	PA3_01304_hypothetical_protein	SP	0.000277	0.998978	0.000191	0.000186	0.00018	0.000167	CS pos: 19-20. Pr: 0.9745
	PA3_01305_hypothetical_protein	LIPO	0	0	1.00006	0	0	0	CS pos: 15-16. Pr: 0.9972
	PA3_01318_hypothetical_protein	LIPO	0	2.4e-05	1.00001	0	0	0	CS pos: 21-22. Pr: 0.9894
	PA3_01331_Outer_membrane_protein_assembly_factor_BamA	SP	0.000271	0.999032	0.000172	0.000178	0.000166	0.000154	CS pos: 20-21. Pr: 0.9793
	PA3_01332_Chaperone_protein_Skp	SP	0.00027	0.999064	0.000158	0.000167	0.00016	0.000143	CS pos: 22-23. Pr: 0.9767
	PA3_01356_Murein_hydrolase_activator_NlpD	LIPO	0.000342	0.105373	0.89424	4.2e-05	1.7e-05	3e-06	CS pos: 37-38. Pr: 0.4437
	PA3_01360_hypothetical_protein	SP	0.000383	0.998752	0.000301	0.000213	0.000171	0.000159	CS pos: 27-28. Pr: 0.9603
	PA3_01368_hypothetical_protein	SP	0.000264	0.999052	0.000183	0.000163	0.000167	0.00015	CS pos: 19-20. Pr: 0.9800
	PA3_01369_Putrescine-binding_periplasmic_protein_SpuD	SP	0.000367	0.998873	0.000197	0.000195	0.000155	0.000149	CS pos: 19-20. Pr: 0.7498
	PA3_01391_Porin-like_protein_NicP	SP	0.343451	0.633111	0.014278	0.003316	0.001944	0.003886	CS pos: 24-25. Pr: 0.5934
	PA3_01393_Aclacinomycin_methylesterase_RdmC	SP	0.000515	0.998444	0.000473	0.000191	0.000182	0.000178	CS pos: 18-19. Pr: 0.9618
	PA3_01404_hypothetical_protein	SP	0.00078	0.739023	0.259169	0.000487	0.00028	0.000229	CS pos: 22-23. Pr: 0.7019
	PA3_01432_hypothetical_protein	SP	0.000681	0.997875	0.000542	0.000377	0.000284	0.000208	CS pos: 28-29. Pr: 0.9660
	PA3_01435_Alginate_lyase	SP	0.000331	0.998917	0.000184	0.000201	0.000166	0.000166	CS pos: 27-28. Pr: 0.9756
	PA3_01436_Alginate_biosynthesis_protein_AlgX	SP	0.000242	0.999119	0.000171	0.000164	0.000149	0.000135	CS pos: 26-27. Pr: 0.9753
	PA3_01437_Poly_beta-D-mannuronate__C5_epimerase	SP	0.000641	0.998403	0.000308	0.000241	0.000203	0.000168	CS pos: 35-36. Pr: 0.9677
	PA3_01438_Alginate_production_protein_AlgE	SP	0.003314	0.992685	0.001717	0.000905	0.000704	0.000664	CS pos: 32-33. Pr: 0.9657
	PA3_01439_Alginate_biosynthesis_protein_AlgK	LIPO	1e-05	0.000343	0.9997	4e-06	1e-06	0	CS pos: 27-28. Pr: 0.9957
	PA3_01447_Extracellular_serine_protease	SP	0.011061	0.987486	0.000599	0.00036	0.000239	0.000214	CS pos: 30-31. Pr: 0.9352
	PA3_01456_Peptidoglycan-associated_lipoprotein	SP	0.000351	0.998901	0.000198	0.000185	0.000171	0.000166	CS pos: 19-20. Pr: 0.9757
	PA3_01459_Efflux_pump_periplasmic_linker_BepF	LIPO	0	0	1.00007	0	0	0	CS pos: 21-22. Pr: 0.9942
	PA3_01461_Outer_membrane_protein_OprM	LIPO	0	0	1.00005	0	0	0	CS pos: 17-18. Pr: 0.9944
	PA3_01479_hypothetical_protein	LIPO	7.1e-05	0.079326	0.920569	2.5e-05	3.3e-05	3e-05	CS pos: 15-16. Pr: 0.9075
	PA3_01489_Cyclohexadienyl_dehydratase	SP	0.000416	0.998682	0.000315	0.000205	0.000192	0.00017	CS pos: 25-26. Pr: 0.9740
	PA3_01492_Murein_DD-endopeptidase_MepH	SP	0.002967	0.9959	0.000505	0.000214	0.000195	0.000189	CS pos: 26-27. Pr: 0.9585
	PA3_01500_hypothetical_protein	SP	0.241085	0.734918	0.022829	0.000355	0.000335	0.000466	CS pos: 21-22. Pr: 0.7045
	PA3_01512_Malate_quinone_oxidoreductase	LIPO	0	1e-06	1.00006	0	0	0	CS pos: 15-16. Pr: 0.9963
	PA3_01515_Putative_aliphatic_sulfonates-binding_protein	SP	0.000304	0.998976	0.000187	0.000195	0.000168	0.000158	CS pos: 26-27. Pr: 0.9771
	PA3_01519_Putative_aliphatic_sulfonates-binding_protein	SP	0.000266	0.998935	0.000204	0.000202	0.000185	0.000167	CS pos: 24-25. Pr: 0.9783
	PA3_01542_hypothetical_protein	LIPO	0.000683	0.395791	0.602651	0.00031	0.000303	0.000248	CS pos: 22-23. Pr: 0.5759
	PA3_01543_hypothetical_protein	SP	0.000261	0.999073	0.000169	0.000181	0.000158	0.000145	CS pos: 23-24. Pr: 0.9797
	PA3_01551_hypothetical_protein	SP	0.002264	0.966016	0.030789	0.000407	0.000251	0.000228	CS pos: 22-23. Pr: 0.9213
	PA3_01553_hypothetical_protein	SP	0.000223	0.999144	0.000164	0.000155	0.000144	0.000134	CS pos: 20-21. Pr: 0.9802
	PA3_01557_Hemin_receptor	SP	0.012143	0.985303	0.001497	0.000546	0.000263	0.000221	CS pos: 36-37. Pr: 0.9392
	PA3_01561_Outer_membrane_protein_TolC	SP	0.002974	0.994349	0.001005	0.000736	0.000428	0.000484	CS pos: 21-22. Pr: 0.9528
	PA3_01567_hypothetical_protein	LIPO	0	2e-06	1.00008	0	0	0	CS pos: 19-20. Pr: 0.9941
	PA3_01570_hypothetical_protein	LIPO	0	3e-06	1.00006	0	0	0	CS pos: 23-24. Pr: 0.9955
	PA3_01573_hypothetical_protein	SP	0.000322	0.998989	0.000173	0.000187	0.000154	0.000143	CS pos: 29-30. Pr: 0.9732
	PA3_01574_Nitrous-oxide_reductase	TAT	1e-06	3e-06	0	0.997587	0.002379	0	CS pos: 49-50. Pr: 0.8607
	PA3_01583_Phosphate-import_protein_PhnD	SP	0.00072	0.998038	0.000402	0.000357	0.000236	0.000215	CS pos: 25-26. Pr: 0.9661
	PA3_01597_hypothetical_protein	SP	0.00042	0.998797	0.00025	0.0002	0.000176	0.000147	CS pos: 27-28. Pr: 0.9722
	PA3_01600_hypothetical_protein	SP	0.000195	0.999174	0.000194	0.000145	0.000129	0.000127	CS pos: 23-24. Pr: 0.9803
	PA3_01617_hypothetical_protein	SP	0.000272	0.999101	0.000188	0.000147	0.000144	0.000136	CS pos: 28-29. Pr: 0.9618
	PA3_01629_putative_NTE_family_protein	SP	0.000274	0.999019	0.000181	0.000169	0.000165	0.000158	CS pos: 18-19. Pr: 0.9790
	PA3_01649_Non-hemolytic_phospholipase_C	TAT	0	0	0	0.999988	0	0	CS pos: 35-36. Pr: 0.8735
	PA3_01651_hypothetical_protein	SP	0.017872	0.918908	0.061807	0.000891	0.000264	0.000238	CS pos: 32-33. Pr: 0.8697
	PA3_01652_hypothetical_protein	LIPO	0	0	1.00007	0	0	0	CS pos: 18-19. Pr: 0.9906
	PA3_01656_Phosphate-import_protein_PhnD	SP	0.000551	0.997853	0.000884	0.00025	0.000219	0.00019	CS pos: 23-24. Pr: 0.9661
	PA3_01676_Alkaline_phosphatase_H	SP	0.000473	0.998819	0.000176	0.000195	0.000161	0.000145	CS pos: 26-27. Pr: 0.9652
	PA3_01680_hypothetical_protein	LIPO	0.00034	0.123582	0.87586	7.4e-05	7e-05	5.8e-05	CS pos: 30-31. Pr: 0.8486
	PA3_01682_hypothetical_protein	LIPO	0	2e-06	1.00006	0	0	0	CS pos: 15-16. Pr: 0.9961
	PA3_01688_hypothetical_protein	SP	0.000236	0.999075	0.000152	0.000175	0.000154	0.000138	CS pos: 25-26. Pr: 0.9781
	PA3_01692_Porin_O	SP	0.001698	0.995047	0.001005	0.000814	0.000727	0.00068	CS pos: 24-25. Pr: 0.9558
	PA3_01693_Porin_P	SP	0.010616	0.986339	0.001277	0.00064	0.0005	0.000589	CS pos: 29-30. Pr: 0.9431
	PA3_01698_hypothetical_protein	LIPO	0.001813	0.416096	0.581504	0.000179	0.000196	0.000196	CS pos: 21-22. Pr: 0.5049
	PA3_01704_Fe_3___dicitrate_transport_protein_FecA	SP	0.000452	0.998823	0.000207	0.000173	0.000159	0.000146	CS pos: 25-26. Pr: 0.9668
	PA3_01712_FKBP-type_22_kDa_peptidyl-prolyl_cis-trans_isomerase	LIPO	0	0	1.00004	0	0	0	CS pos: 19-20. Pr: 0.9973
	PA3_01714_putative_amino-acid_ABC_transporter-binding_protein	SP	0.00081	0.99806	0.000329	0.000246	0.000251	0.000269	CS pos: 19-20. Pr: 0.9696
	PA3_01719_Tail-specific_protease	SP	0.023933	0.97187	0.002997	0.000669	0.000263	0.000229	CS pos: 34-35. Pr: 0.9279
	PA3_01726_hypothetical_protein	SP	0.000342	0.998949	0.000171	0.000184	0.000177	0.000153	CS pos: 22-23. Pr: 0.9755
	PA3_01737_putative_phospholipid-binding_lipoprotein_MlaA	SP	0.000301	0.999054	0.000147	0.000185	0.00015	0.000136	CS pos: 21-22. Pr: 0.9251
	PA3_01738_hypothetical_protein	LIPO	0.000431	0.47885	0.520083	0.000222	0.000214	0.000176	CS pos: 17-18. Pr: 0.4972
	PA3_01740_Glycine_betaine_carnitine_transport_binding_protein_GbuC	SP	0.000366	0.998848	0.000199	0.000211	0.00018	0.000157	CS pos: 25-26. Pr: 0.9582
	PA3_01747_hypothetical_protein	SP	0.000331	0.998798	0.000219	0.000211	0.000215	0.000195	CS pos: 20-21. Pr: 0.9779
	PA3_01749_Peptidyl-prolyl_cis-trans_isomerase_A	SP	0.000323	0.998911	0.000216	0.00018	0.000176	0.00016	CS pos: 20-21. Pr: 0.9785
	PA3_01752_hypothetical_protein	SP	0.000216	0.999166	0.000167	0.00016	0.000151	0.000144	CS pos: 18-19. Pr: 0.9785
	PA3_01762_hypothetical_protein	LIPO	1e-06	2.2e-05	1.00003	0	0	0	CS pos: 25-26. Pr: 0.9899
	PA3_01771_Periplasmic_chaperone_Spy	SP	0.000253	0.999017	0.000169	0.00019	0.000184	0.000152	CS pos: 20-21. Pr: 0.9773
	PA3_01787_putative_sugar-binding_periplasmic_protein	SP	0.000281	0.998959	0.000244	0.000173	0.000169	0.00015	CS pos: 25-26. Pr: 0.9755
	PA3_01791_Porin_B	SP	0.001346	0.996107	0.000838	0.00062	0.000511	0.000517	CS pos: 31-32. Pr: 0.9757
	PA3_01828_ComE_operon_protein_1	SP	0.00054	0.914585	0.084085	0.000273	0.000259	0.000231	CS pos: 22-23. Pr: 0.8809
	PA3_01848_hypothetical_protein	LIPO	0.005956	0.138009	0.85526	0.000237	0.000388	0.000129	CS pos: 28-29. Pr: 0.8164
	PA3_01868_Type_II_secretion_system_protein_D	SP	0.000499	0.998697	0.000204	0.000231	0.000184	0.000164	CS pos: 34-35. Pr: 0.9724
	PA3_01894_hypothetical_protein	SP	0.000483	0.99877	0.00021	0.000196	0.000163	0.000153	CS pos: 34-35. Pr: 0.9682
	PA3_01895_hypothetical_protein	SP	0.000314	0.999037	0.000172	0.000171	0.000151	0.000143	CS pos: 23-24. Pr: 0.9717
	PA3_01896_Ycf48-like_protein	SP	0.372814	0.618726	0.006927	0.000738	0.000425	0.000373	CS pos: 52-53. Pr: 0.5516
	PA3_01900_hypothetical_protein	SP	0.000316	0.998927	0.000226	0.000183	0.000169	0.000159	CS pos: 21-22. Pr: 0.9672
	PA3_01907_hypothetical_protein	LIPO	0.001836	0.029735	0.968169	0.000239	5.1e-05	2e-05	CS pos: 34-35. Pr: 0.9951
	PA3_01913_hypothetical_protein	SP	0.280034	0.63954	0.062568	0.012559	0.004154	0.001147	CS pos: 45-46. Pr: 0.5607
	PA3_01915_hypothetical_protein	LIPO	0	0	1.00005	0	0	0	CS pos: 18-19. Pr: 0.9967
	PA3_01923_hypothetical_protein	SP	0.001062	0.997799	0.000326	0.00033	0.00026	0.000221	CS pos: 23-24. Pr: 0.9647
	PA3_01924_Haloalkane_dehalogenase	SP	0.000361	0.997424	0.001621	0.000216	0.000182	0.000159	CS pos: 19-20. Pr: 0.9716
	PA3_01929_D-alanyl-D-alanine_carboxypeptidase_DacB	SP	0.000333	0.998889	0.00021	0.000184	0.000177	0.000162	CS pos: 22-23. Pr: 0.9740
	PA3_01938_Porin-like_protein_NicP	SP	0.217862	0.763711	0.009508	0.002703	0.001887	0.004309	CS pos: 27-28. Pr: 0.7203
	PA3_01939_putative_metallo-hydrolase	SP	0.000358	0.998928	0.00019	0.000178	0.000161	0.000156	CS pos: 21-22. Pr: 0.9752
	PA3_01945_Cytochrome_c551_peroxidase	SP	0.000312	0.999088	0.000151	0.000157	0.000137	0.00013	CS pos: 25-26. Pr: 0.9610
	PA3_01947_putative_lipoprotein_YgdR	LIPO	0	0	1.00009	0	0	0	CS pos: 20-21. Pr: 0.9954
	PA3_01957_hypothetical_protein	SP	0.000289	0.99901	0.000178	0.00017	0.000161	0.000147	CS pos: 23-24. Pr: 0.9714
	PA3_01958_Soluble_lytic_murein_transglycosylase	SP	0.000408	0.998712	0.000268	0.000209	0.000195	0.000174	CS pos: 24-25. Pr: 0.9714
	PA3_01963_hypothetical_protein	SP	0.000336	0.998916	0.000206	0.000159	0.000168	0.00016	CS pos: 22-23. Pr: 0.9775
	PA3_01975_hypothetical_protein	SP	0.00033	0.998941	0.000196	0.000179	0.000164	0.000149	CS pos: 20-21. Pr: 0.9739
	PA3_01985_FAD_protein_FMN_transferase	LIPO	0	0	1.00009	0	0	0	CS pos: 13-14. Pr: 0.9971
	PA3_01989_hypothetical_protein	SP	0.000657	0.998272	0.000357	0.000254	0.000216	0.000211	CS pos: 18-19. Pr: 0.9767
	PA3_02025_hypothetical_protein	LIPO	1e-06	0.000274	0.999789	0	0	0	CS pos: 19-20. Pr: 0.9884
	PA3_02042_Aminopeptidase	SP	0.000465	0.998782	0.000197	0.000187	0.000172	0.000157	CS pos: 24-25. Pr: 0.9409
	PA3_02048_Soluble_epoxide_hydrolase	SP	0.000353	0.998898	0.000197	0.000205	0.00017	0.000153	CS pos: 24-25. Pr: 0.9754
	PA3_02060_Histidine-binding_periplasmic_protein	SP	0.000309	0.999025	0.000145	0.00019	0.00016	0.000149	CS pos: 20-21. Pr: 0.9733
	PA3_02070_Vitamin_B12-binding_protein	SP	0.000821	0.616072	0.382421	0.000305	0.000192	0.000175	CS pos: 23-24. Pr: 0.5359
	PA3_02074_hypothetical_protein	SP	0.043526	0.952785	0.002213	0.000939	0.00028	0.000223	CS pos: 28-29. Pr: 0.9145
	PA3_02084_hypothetical_protein	SP	0.000589	0.998429	0.000402	0.000211	0.00018	0.000167	CS pos: 26-27. Pr: 0.9632
	PA3_02085_hypothetical_protein	LIPO	0	0	1.00004	0	0	0	CS pos: 13-14. Pr: 0.9968
	PA3_02086_putative_lipoprotein_YiaD	LIPO	0	1e-06	1.00007	0	0	0	CS pos: 19-20. Pr: 0.9929
	PA3_02088_hypothetical_protein	SP	0.001124	0.607215	0.390802	0.000375	0.00025	0.000214	CS pos: 24-25. Pr: 0.5695
	PA3_02117_hypothetical_protein	SP	0.000212	0.999143	0.000168	0.000161	0.000144	0.000131	CS pos: 21-22. Pr: 0.9780
	PA3_02122_Membrane-bound_lytic_murein_transglycosylase_F	SP	0.000187	0.999238	0.000148	0.000146	0.000135	0.000129	CS pos: 21-22. Pr: 0.9751
	PA3_02125_Lactonizing_lipase	SP	0.00042	0.998796	0.000191	0.000225	0.000188	0.000164	CS pos: 26-27. Pr: 0.9718
	PA3_02132_Esterase_TesA	SP	0.00026	0.999056	0.000195	0.000155	0.000155	0.000157	CS pos: 21-22. Pr: 0.9794
	PA3_02134_putative_L,D-transpeptidase_YbiS	SP	0.000206	0.999138	0.000165	0.00018	0.000163	0.000149	CS pos: 23-24. Pr: 0.9705
	PA3_02153_Outer_membrane_protein_OprM	LIPO	0	0	1.00008	0	0	0	CS pos: 16-17. Pr: 0.9931
	PA3_02177_Copper_resistance_protein_K	SP	0.000305	0.998946	0.000197	0.000203	0.000176	0.000154	CS pos: 20-21. Pr: 0.9766
	PA3_02179_Copper_resistance_protein_C	SP	0.001541	0.941287	0.00058	0.055724	0.00056	0.000263	CS pos: 25-26. Pr: 0.9062
	PA3_02183_hypothetical_protein	SP	0.00084	0.997871	0.000339	0.000474	0.000248	0.000188	CS pos: 33-34. Pr: 0.9697
	PA3_02185_Copper_resistance_protein_B	SP	0.00044	0.998624	0.00037	0.000192	0.000174	0.000158	CS pos: 24-25. Pr: 0.9825
	PA3_02186_Copper_resistance_protein_A	TAT	0	1e-06	0	0.999508	0.000481	0	CS pos: 42-43. Pr: 0.9105
	PA3_02207_hypothetical_protein	SP	0.02377	0.892491	0.082657	0.000456	0.000305	0.000293	CS pos: 35-36. Pr: 0.8382
	PA3_02209_hypothetical_protein	SP	0.001206	0.997791	0.000276	0.000284	0.000213	0.000182	CS pos: 34-35. Pr: 0.9594
	PA3_02213_hypothetical_protein	LIPO	0	2e-06	1.00006	0	0	0	CS pos: 23-24. Pr: 0.9964
	PA3_02215_hypothetical_protein	SP	0.000232	0.999156	0.000146	0.00016	0.000141	0.000133	CS pos: 22-23. Pr: 0.9731
	PA3_02220_hypothetical_protein	SP	0.001424	0.997636	0.000327	0.0002	0.000183	0.000188	CS pos: 32-33. Pr: 0.9638
	PA3_02232_hypothetical_protein	SP	0.000674	0.997912	0.000797	0.000216	0.000195	0.000173	CS pos: 27-28. Pr: 0.9638
	PA3_02233_hypothetical_protein	SP	0.00033	0.998915	0.000183	0.000185	0.000182	0.000165	CS pos: 19-20. Pr: 0.9771
	PA3_02234_hypothetical_protein	SP	0.000437	0.998777	0.000217	0.000206	0.000181	0.000163	CS pos: 21-22. Pr: 0.9634
	PA3_02236_hypothetical_protein	LIPO	2.8e-05	0.000859	0.999094	1.2e-05	8e-06	1e-06	CS pos: 30-31. Pr: 0.9888
	PA3_02251_Mercuric_transport_protein_periplasmic_component	SP	0.000255	0.999023	0.0002	0.00018	0.000161	0.000143	CS pos: 23-24. Pr: 0.9765
	PA3_02279_hypothetical_protein	SP	0.000261	0.999059	0.000157	0.000175	0.000163	0.00014	CS pos: 21-22. Pr: 0.9769
	PA3_02287_hypothetical_protein	SP	0.000333	0.998876	0.000169	0.000218	0.000179	0.000173	CS pos: 23-24. Pr: 0.9742
	PA3_02288_hypothetical_protein	SP	0.000527	0.998521	0.000272	0.000284	0.000198	0.000161	CS pos: 24-25. Pr: 0.9673
	PA3_02295_putative_phospholipid-binding_lipoprotein_MlaA	SP	0.000833	0.995767	0.00271	0.000245	0.000222	0.000202	CS pos: 30-31. Pr: 0.9688
	PA3_02304_hypothetical_protein	SP	0.387375	0.607934	0.003186	0.000505	0.000372	0.000607	CS pos: 23-24. Pr: 0.3291
	PA3_02356_hypothetical_protein	LIPO	0	1e-06	1.00004	0	0	0	CS pos: 14-15. Pr: 0.9931
	PA3_02358_hypothetical_protein	SP	0.341901	0.632615	0.022806	0.00091	0.000637	0.001108	CS pos: 25-26. Pr: 0.5154
	PA3_02359_hypothetical_protein	SP	0.000252	0.999135	0.000193	0.000134	0.000127	0.000124	CS pos: 19-20. Pr: 0.9789
	PA3_02363_hypothetical_protein	LIPO	0	0	1.00007	0	0	0	CS pos: 20-21. Pr: 0.9975
	PA3_02364_hypothetical_protein	SP	0.003828	0.994708	0.000442	0.000372	0.000301	0.000306	CS pos: 28-29. Pr: 0.9570
	PA3_02366_hypothetical_protein	LIPO	0	3.3e-05	1.00004	0	0	0	CS pos: 15-16. Pr: 0.9933
	PA3_02370_Carboxypeptidase_G2	SP	0.000456	0.998706	0.000202	0.000214	0.0002	0.000185	CS pos: 24-25. Pr: 0.9785
	PA3_02374_Endo-1,4-beta-xylanase_A	SP	0.000874	0.99769	0.000326	0.000391	0.000371	0.000323	CS pos: 20-21. Pr: 0.9761
	PA3_02379_hypothetical_protein	LIPO	0	1e-06	1.00004	0	0	0	CS pos: 20-21. Pr: 0.9934
	PA3_02386_hypothetical_protein	SP	0.000324	0.998741	0.000265	0.000229	0.000213	0.000201	CS pos: 22-23. Pr: 0.9748
	PA3_02399_hypothetical_protein	LIPO	0	1e-06	1.00006	0	0	0	CS pos: 15-16. Pr: 0.9942
	PA3_02402_hypothetical_protein	LIPO	0	3e-06	1.00004	0	0	0	CS pos: 20-21. Pr: 0.9921
	PA3_02403_Porin_D	SP	0.129115	0.858636	0.005352	0.002445	0.001655	0.00277	CS pos: 21-22. Pr: 0.8390
	PA3_02404_hypothetical_protein	LIPO	0	1e-06	1.00007	0	0	0	CS pos: 15-16. Pr: 0.9949
	PA3_02407_hypothetical_protein	LIPO	0	0	1.00005	0	0	0	CS pos: 10-11. Pr: 0.9965
	PA3_02408_Ecotin	SP	0.000274	0.999013	0.00016	0.000189	0.000168	0.000148	CS pos: 19-20. Pr: 0.9753
	PA3_02414_hypothetical_protein	SP	0.000296	0.998987	0.000195	0.000183	0.000164	0.00016	CS pos: 21-22. Pr: 0.9763
	PA3_02418_hypothetical_protein	SP	0.000316	0.998938	0.000205	0.000177	0.000165	0.000158	CS pos: 18-19. Pr: 0.9749
	PA3_02419_Nuclease_NucM	SP	0.000345	0.999028	0.000151	0.000155	0.00014	0.000133	CS pos: 19-20. Pr: 0.9792
	PA3_02455_hypothetical_protein	LIPO	0	0.000109	0.999961	0	0	0	CS pos: 20-21. Pr: 0.9897
	PA3_02469_Putrescine-binding_periplasmic_protein_SpuD	SP	0.000509	0.699078	0.299612	0.000292	0.000255	0.000219	CS pos: 22-23. Pr: 0.6656
	PA3_02480_Porin_D	SP	0.005638	0.942218	0.049998	0.001318	0.000422	0.000389	CS pos: 24-25. Pr: 0.8858
	PA3_02481_N-substituted_formamide_deformylase	TAT	0	0	0	0.999999	0	0	CS pos: 35-36. Pr: 0.9056
	PA3_02485_hypothetical_protein	LIPO	0	1e-06	1.00006	0	0	0	CS pos: 21-22. Pr: 0.9943
	PA3_02490_Ferri-bacillibactin_esterase_BesA	SP	0.000254	0.999119	0.000148	0.00016	0.000142	0.000131	CS pos: 25-26. Pr: 0.8759
	PA3_02491_Ferric_enterobactin_receptor	SP	0.000489	0.785489	0.213192	0.000342	0.000272	0.00021	CS pos: 25-26. Pr: 0.7650
	PA3_02511_hypothetical_protein	SP	0.000195	0.999216	0.000152	0.000152	0.00014	0.000128	CS pos: 29-30. Pr: 0.9812
	PA3_02521_hypothetical_protein	SP	0.000419	0.981255	0.017521	0.000266	0.000266	0.00023	CS pos: 22-23. Pr: 0.9540
	PA3_02522_hypothetical_protein	SP	0.000263	0.998997	0.000202	0.000164	0.000173	0.000162	CS pos: 24-25. Pr: 0.9785
	PA3_02525_hypothetical_protein	SP	0.000806	0.996417	0.002182	0.000182	0.000201	0.000196	CS pos: 28-29. Pr: 0.9547
	PA3_02547_hypothetical_protein	TAT	7.7e-05	0.000184	1.4e-05	0.933196	0.066522	0	CS pos: 60-61. Pr: 0.8629
	PA3_02549_hypothetical_protein	SP	0.000322	0.998938	0.000216	0.000173	0.000168	0.000158	CS pos: 22-23. Pr: 0.9526
	PA3_02568_Outer-membrane_lipoprotein_carrier_protein	SP	0.000297	0.998934	0.000224	0.000184	0.000184	0.00017	CS pos: 21-22. Pr: 0.9748
	PA3_02625_Putative_aliphatic_sulfonates-binding_protein	SP	0.000313	0.998787	0.000243	0.00025	0.000197	0.000177	CS pos: 23-24. Pr: 0.9735
	PA3_02628_Putative_aliphatic_sulfonates-binding_protein	SP	0.000353	0.998861	0.000206	0.000204	0.000194	0.000168	CS pos: 23-24. Pr: 0.9702
	PA3_02629_hypothetical_protein	SP	0.000205	0.999204	0.000151	0.000158	0.000139	0.000132	CS pos: 20-21. Pr: 0.9794
	PA3_02631_Putative_aliphatic_sulfonates-binding_protein	SP	0.000558	0.998196	0.000565	0.000304	0.000201	0.000173	CS pos: 27-28. Pr: 0.9654
	PA3_02634_Putrescine-binding_periplasmic_protein	SP	0.000295	0.998957	0.000194	0.000192	0.000183	0.00016	CS pos: 25-26. Pr: 0.9223
	PA3_02636_hypothetical_protein	LIPO	0.004283	0.002396	0.985497	0.006495	0.001275	5.1e-05	CS pos: 21-22. Pr: 0.9243
	PA3_02649_hypothetical_protein	LIPO	0	2e-06	1.00002	0	0	0	CS pos: 22-23. Pr: 0.9941
	PA3_02668_hypothetical_protein	SP	0.000239	0.99911	0.000161	0.000176	0.000161	0.000147	CS pos: 25-26. Pr: 0.9740
	PA3_02672_hypothetical_protein	LIPO	0	0	1.00007	0	0	0	CS pos: 19-20. Pr: 0.9962
	PA3_02685_Phosphate-binding_protein_PstS	SP	0.010848	0.987915	0.000356	0.000357	0.000247	0.00023	CS pos: 35-36. Pr: 0.9520
	PA3_02690_Translocation_and_assembly_module_TamA	SP	0.000342	0.998995	0.000183	0.000165	0.000154	0.00014	CS pos: 24-25. Pr: 0.9773
	PA3_02702_Putative_phenylalanine_aminotransferase	TAT	0	0	0	0.999983	1e-06	0	CS pos: 28-29. Pr: 0.9156
	PA3_02708_Outer_membrane_protein_OprM	LIPO	0	0	1.00004	0	0	0	CS pos: 18-19. Pr: 0.9951
	PA3_02712_Cobalt-zinc-cadmium_resistance_protein_CzcC	SP	0.001563	0.993903	0.003821	0.00023	0.000209	0.000218	CS pos: 29-30. Pr: 0.9578
	PA3_02728_hypothetical_protein	SP	0.000246	0.999102	0.000146	0.000177	0.000147	0.000136	CS pos: 21-22. Pr: 0.9641
	PA3_02729_Porin_D	SP	0.082418	0.910929	0.004062	0.000847	0.000699	0.001013	CS pos: 26-27. Pr: 0.8833
	PA3_02739_Solvent_efflux_pump_outer_membrane_protein_SrpC	LIPO	0	2e-06	1.00005	0	0	0	CS pos: 25-26. Pr: 0.9920
	PA3_02741_Efflux_pump_periplasmic_linker_BepF	LIPO	0	3e-06	1.00004	0	0	0	CS pos: 23-24. Pr: 0.9965
	PA3_02752_Cytochrome_c4	SP	0.000215	0.999178	0.000147	0.000154	0.000135	0.000129	CS pos: 21-22. Pr: 0.9786
	PA3_02753_Thiosulfate_dehydrogenase	SP	0.000272	0.999027	0.000164	0.000198	0.00017	0.000156	CS pos: 21-22. Pr: 0.9789
	PA3_02758_Thiol_disulfide_interchange_protein_DsbG	SP	0.000336	0.998821	0.00026	0.000198	0.000187	0.000162	CS pos: 24-25. Pr: 0.9738
	PA3_02760_hypothetical_protein	SP	0.00037	0.998939	0.000177	0.000185	0.000157	0.000146	CS pos: 23-24. Pr: 0.9761
	PA3_02770_Ferrichrome-iron_receptor	SP	0.130416	0.516863	0.035438	0.285356	0.031289	0.000622	CS pos: 47-48. Pr: 0.4798
	PA3_02772_hypothetical_protein	SP	0.000321	0.998979	0.000187	0.000169	0.000172	0.000156	CS pos: 21-22. Pr: 0.9739
	PA3_02773_Hemolysin_transporter_protein_ShlB	SP	0.000325	0.998949	0.0002	0.000175	0.000171	0.000153	CS pos: 22-23. Pr: 0.9791
	PA3_02774_16S_rRNA_endonuclease_CdiA	SP	0.000277	0.999067	0.000176	0.000169	0.000152	0.00014	CS pos: 28-29. Pr: 0.9729
	PA3_02782_hypothetical_protein	LIPO	0	0	1.00005	0	0	0	CS pos: 20-21. Pr: 0.9966
	PA3_02783_Enterochelin_esterase	SP	0.000291	0.998994	0.000201	0.000174	0.000153	0.00014	CS pos: 20-21. Pr: 0.9718
	PA3_02784_hypothetical_protein	SP	0.000263	0.998996	0.00024	0.000164	0.000166	0.00015	CS pos: 23-24. Pr: 0.9790
	PA3_02786_N-substituted_formamide_deformylase	SP	0.001183	0.997666	0.000404	0.000281	0.00023	0.000225	CS pos: 22-23. Pr: 0.9400
	PA3_02798_hypothetical_protein	SP	0.001652	0.99742	0.000317	0.000199	0.000186	0.000178	CS pos: 36-37. Pr: 0.9594
	PA3_02800_hypothetical_protein	SP	0.397243	0.575079	0.025805	0.000856	0.000435	0.000572	CS pos: 32-33. Pr: 0.3837
	PA3_02801_hypothetical_protein	SP	0.000262	0.999108	0.00017	0.000152	0.000149	0.00014	CS pos: 19-20. Pr: 0.9771
	PA3_02819_hypothetical_protein	SP	0.000238	0.999083	0.000208	0.000173	0.000147	0.000133	CS pos: 22-23. Pr: 0.9675
	PA3_02820_Porin_D	SP	0.002678	0.995087	0.000767	0.000488	0.000452	0.000498	CS pos: 25-26. Pr: 0.9669
	PA3_02824_Periplasmic_trehalase	LIPO	0	3e-06	1.00006	0	0	0	CS pos: 22-23. Pr: 0.9949
	PA3_02826_hypothetical_protein	LIPO	0	0	1.00005	0	0	0	CS pos: 20-21. Pr: 0.9940
	PA3_02830_hypothetical_protein	SP	0.000471	0.998167	0.000755	0.000239	0.000189	0.000163	CS pos: 25-26. Pr: 0.9617
	PA3_02833_Manganese_ABC_transporter_substrate-binding_lipoprotein	SP	0.000413	0.998843	0.00025	0.000168	0.000157	0.000137	CS pos: 37-38. Pr: 0.9751
	PA3_02835_hypothetical_protein	SP	0.000249	0.999016	0.000228	0.000166	0.000154	0.000149	CS pos: 25-26. Pr: 0.9743
	PA3_02842_Ferripyoverdine_receptor	SP	0.002144	0.995631	0.000449	0.001234	0.000291	0.000227	CS pos: 28-29. Pr: 0.9559
	PA3_02845_Serine_threonine-protein_kinase_pkn1	SP	0.000237	0.99913	0.000161	0.000166	0.000152	0.000133	CS pos: 21-22. Pr: 0.9789
	PA3_02846_Isopenicillin_N_epimerase	TAT	0	0	0	0.999986	8e-06	0	CS pos: 29-30. Pr: 0.8885
	PA3_02848_hypothetical_protein	TAT	0.001273	4.4e-05	1.6e-05	0.997241	0.00141	1e-06	CS pos: 25-26. Pr: 0.7072
	PA3_02849_Multidrug_solvent_efflux_pump_outer_membrane_protein_MepC	LIPO	0	0	1.00007	0	0	0	CS pos: 15-16. Pr: 0.9962
	PA3_02855_Acyl-homoserine_lactone_acylase_PvdQ	SP	0.000419	0.998775	0.000188	0.000236	0.000198	0.000167	CS pos: 23-24. Pr: 0.9699
	PA3_02862_Isoquinoline_1-oxidoreductase_subunit_beta	TAT	0	0	0	0.999813	0.000183	0	CS pos: 42-43. Pr: 0.8662
	PA3_02863_hypothetical_protein	SP	0.000671	0.998454	0.000214	0.000229	0.000219	0.000195	CS pos: 22-23. Pr: 0.9772
	PA3_02877_hypothetical_protein	LIPO	1e-06	1.7e-05	1.00001	0	0	0	CS pos: 23-24. Pr: 0.9905
	PA3_02889_Glycerophosphodiester_phosphodiesterase	SP	0.002226	0.994498	0.001157	0.001592	0.000276	0.000227	CS pos: 26-27. Pr: 0.9532
	PA3_02892_D-methionine-binding_lipoprotein_MetQ	SP	0.000362	0.998825	0.000206	0.000224	0.000182	0.000163	CS pos: 21-22. Pr: 0.9734
	PA3_02903_Erythritol_L-threitol-binding_protein	SP	0.000298	0.998939	0.000236	0.000182	0.000172	0.000151	CS pos: 22-23. Pr: 0.9706
	PA3_02905_hypothetical_protein	SP	0.000264	0.999096	0.000152	0.000175	0.000146	0.000137	CS pos: 20-21. Pr: 0.9773
	PA3_02906_Pesticin_receptor	SP	0.036487	0.665306	0.245092	0.03624	0.015532	0.001331	CS pos: 40-41. Pr: 0.6377
	PA3_02913_Nitrate_transport_protein_NrtA	TAT	0	0	0	0.999993	0	0	CS pos: 36-37. Pr: 0.8976
	PA3_02932_hypothetical_protein	SP	0.000383	0.998857	0.000232	0.000178	0.000165	0.000149	CS pos: 32-33. Pr: 0.9622
	PA3_02945_Putative_aliphatic_sulfonates-binding_protein	SP	0.000376	0.998746	0.000263	0.000223	0.000188	0.000177	CS pos: 21-22. Pr: 0.9771
	PA3_02951_Porin_B	SP	0.002874	0.989505	0.005481	0.000978	0.000589	0.000539	CS pos: 29-30. Pr: 0.9454
	PA3_02953_Hemin_receptor	LIPO	0.00339	0.261604	0.734496	0.000171	0.000168	0.000146	CS pos: 26-27. Pr: 0.6673
	PA3_02961_hypothetical_protein	LIPO	0.000601	0.441453	0.557061	0.000458	0.000241	0.000183	CS pos: 18-19. Pr: 0.5225
	PA3_02977_Gluconate_2-dehydrogenase_cytochrome_c_subunit	SP	0.000584	0.742549	0.256109	0.000283	0.000233	0.000213	CS pos: 19-20. Pr: 0.7181
	PA3_02979_Gluconate_2-dehydrogenase_subunit_3	TAT	1.7e-05	0.000125	7e-06	0.961961	0.037882	1e-06	CS pos: 34-35. Pr: 0.8219
	PA3_02986_Cytochrome_c4	SP	0.003815	0.992991	0.000716	0.001861	0.000346	0.000241	CS pos: 23-24. Pr: 0.9369
	PA3_03007_hypothetical_protein	SP	0.006475	0.992084	0.000606	0.000344	0.000217	0.000215	CS pos: 30-31. Pr: 0.9419
	PA3_03010_hypothetical_protein	LIPO	1e-06	1.5e-05	1.00002	0	0	0	CS pos: 23-24. Pr: 0.9961
	PA3_03014_hypothetical_protein	LIPO	0	0	1.00007	0	0	0	CS pos: 15-16. Pr: 0.9967
	PA3_03016_6-aminohexanoate-dimer_hydrolase	LIPO	0.332071	0.009503	0.648546	0.000115	5.8e-05	0.009695	CS pos: 20-21. Pr: 0.4591
	PA3_03018_hypothetical_protein	LIPO	0.012017	0.001577	0.986457	4e-06	5e-06	4e-06	CS pos: 9-10. Pr: 0.9603
	PA3_03019_hypothetical_protein	SP	0.000231	0.999164	0.000143	0.000156	0.000141	0.000133	CS pos: 23-24. Pr: 0.9774
	PA3_03028_hypothetical_protein	LIPO	0	0	1.00005	0	0	0	CS pos: 18-19. Pr: 0.9956
	PA3_03029_hypothetical_protein	LIPO	0	0	1.00003	0	0	0	CS pos: 18-19. Pr: 0.9973
	PA3_03033_Ycf48-like_protein	SP	0.000362	0.998868	0.000202	0.00021	0.000163	0.000156	CS pos: 23-24. Pr: 0.9814
	PA3_03057_hypothetical_protein	SP	0.000353	0.99885	0.000243	0.000178	0.000182	0.000157	CS pos: 21-22. Pr: 0.9719
	PA3_03066_Porin-like_protein_NicP	SP	0.270263	0.715705	0.006491	0.002504	0.001559	0.00345	CS pos: 28-29. Pr: 0.6783
	PA3_03070_hypothetical_protein	SP	0.003006	0.600079	0.395293	0.001021	0.000321	0.000252	CS pos: 29-30. Pr: 0.3505
	PA3_03074_hypothetical_protein	LIPO	0	0	1.00007	0	0	0	CS pos: 18-19. Pr: 0.9954
	PA3_03075_ABC_transporter_glutamine-binding_protein_GlnH	SP	0.00031	0.997006	0.00202	0.000234	0.000206	0.000178	CS pos: 21-22. Pr: 0.9719
	PA3_03123_Alcohol_dehydrogenase	SP	0.40852	0.585051	0.00562	0.000263	0.000228	0.0003	CS pos: 25-26. Pr: 0.5434
	PA3_03132_Non-homologous_end_joining_protein_Ku	SP	0.00036	0.998963	0.000175	0.000172	0.000152	0.000138	CS pos: 23-24. Pr: 0.9718
	PA3_03152_hypothetical_protein	SP	0.000301	0.999015	0.000204	0.00016	0.000152	0.00014	CS pos: 26-27. Pr: 0.9757
	PA3_03156_hypothetical_protein	SP	0.0002	0.999239	0.000145	0.000144	0.000127	0.000125	CS pos: 25-26. Pr: 0.8888
	PA3_03157_putative_outer_membrane_usher_protein_ElfC	SP	0.145667	0.835574	0.007289	0.006785	0.002063	0.002598	CS pos: 30-31. Pr: 0.7954
	PA3_03158_putative_fimbrial_chaperone_YadV	SP	0.001035	0.997811	0.000524	0.000237	0.000189	0.00018	CS pos: 27-28. Pr: 0.7017
	PA3_03163_Oxygen-dependent_choline_dehydrogenase	TAT	2e-06	2.5e-05	0	0.999903	3.7e-05	0	CS pos: 38-39. Pr: 0.8857
	PA3_03169_hypothetical_protein	SP	0.000443	0.998798	0.000188	0.000211	0.00017	0.000156	CS pos: 21-22. Pr: 0.8842
	PA3_03175_Porin-like_protein_NicP	SP	0.198504	0.789396	0.005606	0.002018	0.001466	0.002978	CS pos: 25-26. Pr: 0.6933
	PA3_03179_hypothetical_protein	SP	0.0003	0.999024	0.000183	0.000168	0.00016	0.000151	CS pos: 19-20. Pr: 0.9801
	PA3_03199_Ferric_enterobactin_receptor	LIPO	0.001584	0.288413	0.70744	0.001392	0.000675	0.000471	CS pos: 21-22. Pr: 0.6734
	PA3_03210_hypothetical_protein	SP	0.000397	0.99888	0.000182	0.000185	0.000158	0.000142	CS pos: 23-24. Pr: 0.9659
	PA3_03211_hypothetical_protein	SP	0.000247	0.999094	0.000174	0.000164	0.000145	0.000128	CS pos: 21-22. Pr: 0.9775
	PA3_03217_Colicin_I_receptor	SP	0.000522	0.998686	0.000226	0.0002	0.000165	0.000152	CS pos: 28-29. Pr: 0.9601
	PA3_03222_Copper_resistance_protein_A	TAT	0	0	0	1	0	0	CS pos: 31-32. Pr: 0.9358
	PA3_03223_Copper_resistance_protein_B	SP	0.000312	0.998936	0.000231	0.000183	0.000174	0.000162	CS pos: 29-30. Pr: 0.9760
	PA3_03229_Oligopeptide-binding_protein_AppA	SP	0.000204	0.999224	0.000154	0.000145	0.000132	0.000122	CS pos: 19-20. Pr: 0.9745
	PA3_03230_Colicin_I_receptor	SP	0.000755	0.99822	0.000231	0.000313	0.000235	0.000204	CS pos: 32-33. Pr: 0.9011
	PA3_03241_hypothetical_protein	SP	0.00025	0.999103	0.000192	0.000163	0.000153	0.000142	CS pos: 18-19. Pr: 0.9768
	PA3_03243_hypothetical_protein	SP	0.00026	0.99913	0.000147	0.000176	0.000136	0.000129	CS pos: 24-25. Pr: 0.9769
	PA3_03266_Multidrug_export_protein_AcrE	LIPO	0	4e-06	1.00003	0	0	0	CS pos: 23-24. Pr: 0.9951
	PA3_03268_hypothetical_protein	LIPO	0	0.00011	0.999919	0	0	0	CS pos: 20-21. Pr: 0.9870
	PA3_03269_hypothetical_protein	SP	0.003599	0.99168	0.003896	0.000246	0.000272	0.000283	CS pos: 25-26. Pr: 0.9478
	PA3_03303_Quinohemoprotein_alcohol_dehydrogenase_ADH-IIG	SP	0.000435	0.998538	0.000382	0.000228	0.000214	0.00019	CS pos: 24-25. Pr: 0.9766
	PA3_03304_Quinoprotein_ethanol_dehydrogenase	SP	0.000306	0.999017	0.000159	0.000184	0.000159	0.00014	CS pos: 34-35. Pr: 0.9682
	PA3_03305_Secreted_effector_protein_PipB2	SP	0.000367	0.998834	0.000272	0.000171	0.000167	0.000164	CS pos: 18-19. Pr: 0.9764
	PA3_03314_hypothetical_protein	SP	0.003364	0.99233	0.002566	0.000719	0.000497	0.000469	CS pos: 30-31. Pr: 0.9486
	PA3_03319_hypothetical_protein	LIPO	0	0	1.00007	0	0	0	CS pos: 17-18. Pr: 0.9964
	PA3_03320_hypothetical_protein	LIPO	0	0	1.00008	0	0	0	CS pos: 18-19. Pr: 0.9963
	PA3_03324_hypothetical_protein	LIPO	0	1e-06	1.00003	0	0	0	CS pos: 17-18. Pr: 0.9955
	PA3_03333_hypothetical_protein	SP	0.000362	0.998981	0.000188	0.000177	0.000156	0.000141	CS pos: 28-29. Pr: 0.9703
	PA3_03334_hypothetical_protein	SP	0.000338	0.998399	0.000659	0.0002	0.000198	0.000184	CS pos: 19-20. Pr: 0.9734
	PA3_03335_hypothetical_protein	SP	0.000227	0.999148	0.000167	0.000151	0.000143	0.000134	CS pos: 24-25. Pr: 0.9783
	PA3_03336_Lactococcin-G-processing_and_transport_ATP-binding_protein_LagD	SP	0.000221	0.999177	0.000154	0.000164	0.000145	0.000143	CS pos: 18-19. Pr: 0.9798
	PA3_03337_hypothetical_protein	SP	0.092525	0.839421	0.065785	0.001596	0.00033	0.000313	CS pos: 27-28. Pr: 0.6968
	PA3_03338_hypothetical_protein	SP	0.00064	0.99825	0.000434	0.000237	0.000227	0.000188	CS pos: 24-25. Pr: 0.9696
	PA3_03343_Ribose_import_binding_protein_RbsB	SP	0.000863	0.808318	0.187729	0.0022	0.000541	0.000304	CS pos: 29-30. Pr: 0.7667
	PA3_03355_hypothetical_protein	SP	0.000335	0.998861	0.000163	0.000236	0.000204	0.000185	CS pos: 21-22. Pr: 0.9775
	PA3_03367_Colicin_I_receptor	SP	0.070101	0.928885	0.000326	0.000221	0.000215	0.000213	CS pos: 31-32. Pr: 0.8995
	PA3_03376_hypothetical_protein	SP	0.000232	0.999124	0.000151	0.000177	0.000148	0.000136	CS pos: 25-26. Pr: 0.9773
	PA3_03380_Ferrichrome_receptor_FcuA	SP	0.009346	0.984146	0.000429	0.005346	0.000413	0.000293	CS pos: 33-34. Pr: 0.9505
	PA3_03402_hypothetical_protein	LIPO	0	1e-06	1.00005	0	0	0	CS pos: 17-18. Pr: 0.9952
	PA3_03404_hypothetical_protein	LIPO	0	1e-06	1.00005	0	0	0	CS pos: 14-15. Pr: 0.9958
	PA3_03405_hypothetical_protein	SP	0.00023	0.999197	0.000143	0.000157	0.000137	0.000131	CS pos: 27-28. Pr: 0.8182
	PA3_03412_Isoquinoline_1-oxidoreductase_subunit_beta	TAT	4e-06	4e-06	1e-06	0.990831	0.009173	0	CS pos: 41-42. Pr: 0.8294
	PA3_03417_hypothetical_protein	SP	0.004703	0.9942	0.000413	0.000226	0.000195	0.000207	CS pos: 32-33. Pr: 0.9411
	PA3_03421_Protease_LasA	SP	0.000378	0.998841	0.000217	0.000187	0.00018	0.000163	CS pos: 31-32. Pr: 0.9715
	PA3_03424_Type_II_secretion_system_protein_D	SP	0.000288	0.999021	0.000178	0.000181	0.00015	0.000139	CS pos: 32-33. Pr: 0.9824
	PA3_03430_Molybdate-binding_periplasmic_protein	SP	0.000268	0.999071	0.000169	0.000172	0.000151	0.000148	CS pos: 20-21. Pr: 0.9711
	PA3_03448_hypothetical_protein	SP	0.000201	0.999237	0.000149	0.000147	0.000132	0.000126	CS pos: 22-23. Pr: 0.9764
	PA3_03449_hypothetical_protein	SP	0.000366	0.998841	0.000254	0.00018	0.000167	0.000153	CS pos: 19-20. Pr: 0.9711
	PA3_03484_Membrane-bound_lytic_murein_transglycosylase_D	LIPO	7.1e-05	0.005162	0.994722	1.1e-05	1.4e-05	2e-06	CS pos: 31-32. Pr: 0.9812
	PA3_03485_putative_D,D-dipeptide-binding_periplasmic_protein_DdpA	SP	0.00024	0.999094	0.000179	0.000168	0.000155	0.000139	CS pos: 19-20. Pr: 0.9798
	PA3_03487_Oligopeptide-binding_protein_AppA	SP	0.000666	0.573247	0.425193	0.00034	0.000299	0.00024	CS pos: 23-24. Pr: 0.5458
	PA3_03501_Putative_penicillin-binding_protein_PbpX	LIPO	0	6e-06	1.00003	0	0	0	CS pos: 18-19. Pr: 0.9922
	PA3_03502_hypothetical_protein	LIPO	0.107242	0.002775	0.752141	0.132889	0.004472	0.000472	CS pos: 14-15. Pr: 0.6217
	PA3_03527_Outer_membrane_porin_F	SP	0.010359	0.985316	0.00113	0.001049	0.000984	0.001108	CS pos: 24-25. Pr: 0.9577
	PA3_03536_hypothetical_protein	SP	0.00025	0.999084	0.000181	0.000147	0.000147	0.000136	CS pos: 22-23. Pr: 0.9777
	PA3_03539_hypothetical_protein	SP	0.000246	0.999099	0.000157	0.000172	0.000151	0.000136	CS pos: 23-24. Pr: 0.9722
	PA3_03540_Long-chain_fatty_acid_transport_protein	SP	0.000283	0.999032	0.000206	0.000164	0.000148	0.000137	CS pos: 25-26. Pr: 0.9750
	PA3_03541_hypothetical_protein	SP	0.000444	0.998432	0.000584	0.000181	0.000174	0.00016	CS pos: 22-23. Pr: 0.9767
	PA3_03542_Lactococcin-G-processing_and_transport_ATP-binding_protein_LagD	SP	0.002326	0.996775	0.000225	0.000238	0.000202	0.000199	CS pos: 21-22. Pr: 0.8622
	PA3_03543_hypothetical_protein	SP	0.000915	0.997427	0.000511	0.000399	0.000382	0.000354	CS pos: 20-21. Pr: 0.9724
	PA3_03557_hypothetical_protein	SP	0.000284	0.998897	0.000213	0.000223	0.000195	0.000178	CS pos: 24-25. Pr: 0.9703
	PA3_03559_hypothetical_protein	LIPO	0	1e-06	1.00004	0	0	0	CS pos: 15-16. Pr: 0.9949
	PA3_03564_hypothetical_protein	SP	0.00042	0.998691	0.00024	0.000237	0.000201	0.000174	CS pos: 24-25. Pr: 0.9734
	PA3_03571_hypothetical_protein	SP	0.000437	0.998705	0.000234	0.000215	0.000204	0.00018	CS pos: 23-24. Pr: 0.9563
	PA3_03579_Beta-glucosidase_BoGH3B	SP	0.000325	0.998933	0.000195	0.000181	0.00017	0.000149	CS pos: 20-21. Pr: 0.9730
	PA3_03589_Type_III_secretion_system_outer_membrane_protein_SpiA	SP	0.000335	0.9989	0.00021	0.000189	0.000174	0.00016	CS pos: 20-21. Pr: 0.8767
	PA3_03593_Exoenzyme_S_synthesis_protein_B	LIPO	0	0	1.00004	0	0	0	CS pos: 11-12. Pr: 0.9962
	PA3_03627_Esterase_EstD	SP	0.000212	0.999172	0.000163	0.000155	0.000143	0.000133	CS pos: 22-23. Pr: 0.9814
	PA3_03641_hypothetical_protein	LIPO	0	2e-06	1.00006	0	0	0	CS pos: 23-24. Pr: 0.9963
	PA3_03643_hypothetical_protein	LIPO	0	4e-06	1	0	0	0	CS pos: 21-22. Pr: 0.9870
	PA3_03667_hypothetical_protein	SP	0.000243	0.999106	0.000207	0.000147	0.000125	0.000123	CS pos: 19-20. Pr: 0.9777
	PA3_03672_hypothetical_protein	LIPO	0	0	1.00005	0	0	0	CS pos: 16-17. Pr: 0.9973
	PA3_03674_hypothetical_protein	LIPO	0.000451	0.285917	0.713127	0.000196	0.000173	0.000139	CS pos: 19-20. Pr: 0.6822
	PA3_03689_hypothetical_protein	SP	0.000328	0.998899	0.000221	0.000181	0.000179	0.000164	CS pos: 18-19. Pr: 0.9770
	PA3_03700_Colicin_I_receptor	SP	0.001306	0.997903	0.000252	0.000198	0.000175	0.000171	CS pos: 25-26. Pr: 0.7542
	PA3_03702_hypothetical_protein	SP	0.001647	0.870635	0.126565	0.000546	0.000313	0.000267	CS pos: 28-29. Pr: 0.8192
	PA3_03708_hypothetical_protein	SP	0.001199	0.99782	0.000342	0.000235	0.000196	0.000176	CS pos: 25-26. Pr: 0.6925
	PA3_03710_hypothetical_protein	SP	0.010384	0.988592	0.000355	0.000225	0.000192	0.000196	CS pos: 38-39. Pr: 0.9042
	PA3_03713_Nicotinate_dehydrogenase_subunit_B	TAT	0	0	0	0.999985	0	0	CS pos: 32-33. Pr: 0.9257
	PA3_03722_hypothetical_protein	LIPO	0	1e-06	1.00007	0	0	0	CS pos: 19-20. Pr: 0.9906
	PA3_03735_hypothetical_protein	SP	0.000296	0.999037	0.000181	0.000166	0.00016	0.000144	CS pos: 23-24. Pr: 0.9740
	PA3_03742_hypothetical_protein	SP	0.000393	0.998959	0.00015	0.000181	0.000153	0.000142	CS pos: 25-26. Pr: 0.9760
	PA3_03786_hypothetical_protein	SP	0.000249	0.999183	0.000135	0.000156	0.000132	0.000128	CS pos: 23-24. Pr: 0.8259
	PA3_03809_Ferric_aerobactin_receptor	SP	0.001113	0.997649	0.000494	0.000296	0.000213	0.000185	CS pos: 27-28. Pr: 0.9576
	PA3_03827_hypothetical_protein	SP	0.000241	0.99914	0.000162	0.000153	0.000137	0.000131	CS pos: 22-23. Pr: 0.9752
	PA3_03832_hypothetical_protein	SP	0.01237	0.981717	0.00214	0.001411	0.001007	0.001323	CS pos: 18-19. Pr: 0.9622
	PA3_03833_Glutamate_aspartate_import_solute-binding_protein	SP	0.000561	0.998517	0.000251	0.000235	0.000205	0.000182	CS pos: 23-24. Pr: 0.9774
	PA3_03837_Gamma-glutamyltranspeptidase	SP	0.00045	0.998554	0.000235	0.000255	0.000246	0.00023	CS pos: 24-25. Pr: 0.9700
	PA3_03838_Glutaminase-asparaginase	SP	0.001574	0.997232	0.000412	0.000262	0.00024	0.000218	CS pos: 25-26. Pr: 0.9718
	PA3_03842_hypothetical_protein	LIPO	0	0	1.00001	0	0	0	CS pos: 18-19. Pr: 0.9966
	PA3_03851_hypothetical_protein	LIPO	0	0	1.00006	0	0	0	CS pos: 19-20. Pr: 0.9954
	PA3_03853_putative_TonB-dependent_receptor_BfrD	LIPO	0.001264	0.235014	0.761431	0.001082	0.000767	0.000425	CS pos: 25-26. Pr: 0.7238
	PA3_03873_TonB-dependent_heme_receptor_A	SP	0.00124	0.997795	0.000309	0.000226	0.000198	0.000186	CS pos: 30-31. Pr: 0.9519
	PA3_03894_hypothetical_protein	LIPO	0	1.1e-05	1.00005	0	0	0	CS pos: 20-21. Pr: 0.9920
	PA3_03909_hypothetical_protein	SP	0.000324	0.998987	0.000185	0.000182	0.000164	0.000146	CS pos: 22-23. Pr: 0.9737
	PA3_03910_Sulfate-binding_protein	SP	0.000341	0.998816	0.000205	0.000223	0.000188	0.000171	CS pos: 22-23. Pr: 0.9720
	PA3_03921_hypothetical_protein	LIPO	0	0	1.00004	0	0	0	CS pos: 17-18. Pr: 0.9941
	PA3_03935_hypothetical_protein	SP	0.000326	0.999055	0.000174	0.000158	0.000138	0.000135	CS pos: 34-35. Pr: 0.9129
	PA3_03971_hypothetical_protein	SP	0.193892	0.80431	0.000643	0.000381	0.000306	0.00043	CS pos: 35-36. Pr: 0.7499
	PA3_03995_Putrescine-binding_periplasmic_protein	SP	0.000239	0.999141	0.000172	0.000162	0.00015	0.000134	CS pos: 22-23. Pr: 0.9794
	PA3_04007_hypothetical_protein	LIPO	0	1e-06	1.00006	0	0	0	CS pos: 17-18. Pr: 0.9950
	PA3_04009_hypothetical_protein	LIPO	0	0	1.00007	0	0	0	CS pos: 19-20. Pr: 0.9950
	PA3_04011_hypothetical_protein	LIPO	0	0	1.00005	0	0	0	CS pos: 19-20. Pr: 0.9951
	PA3_04018_hypothetical_protein	LIPO	0	0	1.00004	0	0	0	CS pos: 17-18. Pr: 0.9942
	PA3_04025_Glutathione_peroxidase__BsaA	SP	0.000385	0.998886	0.000238	0.000181	0.000156	0.000145	CS pos: 21-22. Pr: 0.9654
	PA3_04041_Vitamin_B12_transporter_BtuB	SP	0.000488	0.998702	0.000292	0.000199	0.000171	0.000144	CS pos: 22-23. Pr: 0.9714
	PA3_04046_Hydrogen_cyanide_synthase_subunit_HcnA	TATLIPO	0.012182	0.015116	0.040157	0.427819	0.504555	0.000164	CS pos: 29-30. Pr: 0.2810
	PA3_04053_Putative_ABC_transporter_arginine-binding_protein_2	SP	0.000835	0.945147	0.053052	0.000393	0.00028	0.000253	CS pos: 25-26. Pr: 0.9118
	PA3_04063_Proteinase_inhibitor	SP	0.116867	0.879267	0.002813	0.000415	0.000269	0.000351	CS pos: 25-26. Pr: 0.7788
	PA3_04065_Outer_membrane_protein_TolC	SP	0.000367	0.99886	0.000212	0.000181	0.000174	0.000169	CS pos: 24-25. Pr: 0.9712
	PA3_04071_Cell_wall-associated_protease	SP	0.000653	0.998603	0.000233	0.000178	0.000173	0.000156	CS pos: 22-23. Pr: 0.7641
	PA3_04072_Outer_membrane_protein_OprM	LIPO	0	1e-05	1	0	0	0	CS pos: 21-22. Pr: 0.9878
	PA3_04088_Membrane-bound_lytic_murein_transglycosylase_A	LIPO	1e-06	7e-06	1.00008	0	0	0	CS pos: 24-25. Pr: 0.9953
	PA3_04111_Murein_DD-endopeptidase_MepH	LIPO	0	0	1.00006	0	0	0	CS pos: 18-19. Pr: 0.9968
	PA3_04112_Murein_DD-endopeptidase_MepH	LIPO	0	0	1.00005	0	0	0	CS pos: 19-20. Pr: 0.9968
	PA3_04132_hypothetical_protein	SP	0.000265	0.998958	0.000188	0.000203	0.00018	0.000163	CS pos: 22-23. Pr: 0.9750
	PA3_04136_Periplasmic_nitrate_reductase	TAT	0	0	0	0.999973	0	0	CS pos: 29-30. Pr: 0.9298
	PA3_04137_Periplasmic_nitrate_reductase,_electron_transfer_subunit	SP	0.000292	0.999016	0.000179	0.000166	0.000165	0.00015	CS pos: 20-21. Pr: 0.9763
	PA3_04139_Membrane-bound_lytic_murein_transglycosylase_B	SP	0.000201	0.999188	0.000157	0.000156	0.000145	0.000137	CS pos: 18-19. Pr: 0.9780
	PA3_04142_Linoleate_9_13-lipoxygenase	SP	0.008845	0.723752	0.002316	0.26161	0.002806	0.000641	CS pos: 19-20. Pr: 0.6939
	PA3_04145_hypothetical_protein	SP	0.001432	0.898855	0.098736	0.000373	0.000298	0.000279	CS pos: 18-19. Pr: 0.8554
	PA3_04164_hypothetical_protein	SP	0.000375	0.998871	0.000224	0.000176	0.000166	0.000164	CS pos: 20-21. Pr: 0.9733
	PA3_04165_Exotoxin_A	SP	0.000367	0.998985	0.000188	0.000152	0.000136	0.000137	CS pos: 25-26. Pr: 0.8699
	PA3_04174_hypothetical_protein	SP	0.000233	0.999179	0.000156	0.00015	0.000138	0.000136	CS pos: 24-25. Pr: 0.9698
	PA3_04181_hypothetical_protein	LIPO	0	1e-06	1.00005	0	0	0	CS pos: 20-21. Pr: 0.9948
	PA3_04195_Outer_membrane_porin_F	LIPO	0	6e-06	1.00005	0	0	0	CS pos: 25-26. Pr: 0.9954
	PA3_04200_hypothetical_protein	SP	0.000253	0.999088	0.000185	0.000158	0.000142	0.000134	CS pos: 20-21. Pr: 0.9774
	PA3_04204_Aldose_sugar_dehydrogenase_YliI	SP	0.000274	0.999014	0.000194	0.000189	0.000161	0.000153	CS pos: 23-24. Pr: 0.9764
	PA3_04210_hypothetical_protein	SP	0.000864	0.997658	0.000355	0.000408	0.000347	0.000333	CS pos: 20-21. Pr: 0.9708
	PA3_04232_hypothetical_protein	SP	0.000274	0.999087	0.000175	0.000158	0.000149	0.000137	CS pos: 22-23. Pr: 0.9758
	PA3_04233_hypothetical_protein	LIPO	0	0	1.00006	0	0	0	CS pos: 18-19. Pr: 0.9959
	PA3_04242_Leucine-,_isoleucine-,_valine-,_threonine-,_and_alanine-binding_prote	SP	0.000349	0.998877	0.000208	0.00019	0.000188	0.000165	CS pos: 26-27. Pr: 0.9747
	PA3_04252_hypothetical_protein	LIPO	0	5.6e-05	1	0	0	0	CS pos: 17-18. Pr: 0.9927
	PA3_04263_Outer_membrane_lipoprotein_SlyB	LIPO	0	0	1.00005	0	0	0	CS pos: 20-21. Pr: 0.9957
	PA3_04269_putative_lipoprotein_YiaD	LIPO	0	0	1.00007	0	0	0	CS pos: 17-18. Pr: 0.9942
	PA3_04271_hypothetical_protein	SP	0.018824	0.977446	0.002809	0.000334	0.00027	0.000284	CS pos: 23-24. Pr: 0.8955
	PA3_04274_hypothetical_protein	SP	0.000349	0.998944	0.000199	0.000181	0.000175	0.000154	CS pos: 22-23. Pr: 0.9397
	PA3_04276_Outer_membrane_porin_F	LIPO	6.3e-05	0.000205	0.999732	1e-06	1e-06	1e-06	CS pos: 19-20. Pr: 0.9830
	PA3_04282_hypothetical_protein	LIPO	0	1.5e-05	1.00004	0	0	0	CS pos: 25-26. Pr: 0.9939
	PA3_04285_Acyl-homoserine_lactone_acylase_QuiP	LIPO	1e-06	4.5e-05	0.999981	0	0	0	CS pos: 27-28. Pr: 0.9913
	PA3_04293_Porin-like_protein_NicP	SP	0.147979	0.839993	0.006364	0.001727	0.001385	0.00253	CS pos: 22-23. Pr: 0.7787
	PA3_04310_hypothetical_protein	LIPO	0	2e-06	1.00008	0	0	0	CS pos: 19-20. Pr: 0.9901
	PA3_04316_Beta-barrel_assembly-enhancing_protease	SP	0.000202	0.999187	0.000161	0.000148	0.000138	0.000125	CS pos: 21-22. Pr: 0.9791
	PA3_04327_Outer_membrane_usher_protein_FimD	SP	0.030724	0.934647	0.033052	0.000856	0.000367	0.000329	CS pos: 34-35. Pr: 0.8733
	PA3_04328_putative_fimbrial_chaperone_YadV	SP	0.000463	0.998792	0.000274	0.000168	0.000154	0.000153	CS pos: 24-25. Pr: 0.9758
	PA3_04329_hypothetical_protein	SP	0.000273	0.998981	0.000198	0.000182	0.000179	0.00016	CS pos: 23-24. Pr: 0.9779
	PA3_04332_hypothetical_protein	SP	0.000566	0.998671	0.000207	0.000207	0.000175	0.000152	CS pos: 26-27. Pr: 0.9769
	PA3_04340_hypothetical_protein	SP	0.001256	0.774746	0.223242	0.000309	0.000229	0.000213	CS pos: 20-21. Pr: 0.7435
	PA3_04346_Cell_division_coordinator_CpoB	SP	0.000331	0.998887	0.000196	0.000197	0.000185	0.000168	CS pos: 21-22. Pr: 0.9758
	PA3_04347_Peptidoglycan-associated_lipoprotein	LIPO	0	1e-06	1.00006	0	0	0	CS pos: 21-22. Pr: 0.9959
	PA3_04348_Dipeptidyl-peptidase_5	SP	0.000237	0.999136	0.000175	0.000152	0.000145	0.000137	CS pos: 21-22. Pr: 0.9731
	PA3_04362_Porin_D	SP	0.205903	0.789665	0.001787	0.000903	0.000701	0.001012	CS pos: 23-24. Pr: 0.7435
	PA3_04365_hypothetical_protein	LIPO	0	1e-06	1.00005	0	0	0	CS pos: 22-23. Pr: 0.9964
	PA3_04367_Thiol-disulfide_oxidoreductase_ResA	LIPO	0	3.5e-05	1.00004	0	0	0	CS pos: 18-19. Pr: 0.9944
	PA3_04375_hypothetical_protein	SP	0.000254	0.999094	0.000182	0.000154	0.00015	0.000142	CS pos: 20-21. Pr: 0.9792
	PA3_04378_hypothetical_protein	SP	0.000443	0.998646	0.000238	0.000212	0.000222	0.000203	CS pos: 18-19. Pr: 0.9766
	PA3_04391_Ferric_enterobactin_receptor	SP	0.002989	0.994482	0.001178	0.000759	0.000329	0.000228	CS pos: 28-29. Pr: 0.9563
	PA3_04397_hypothetical_protein	LIPO	0	1e-06	1.00005	0	0	0	CS pos: 17-18. Pr: 0.9965
	PA3_04411_hypothetical_protein	SP	0.00033	0.998998	0.000163	0.000165	0.000148	0.000146	CS pos: 18-19. Pr: 0.9748
	PA3_04439_Lysine_arginine_ornithine-binding_periplasmic_protein	SP	0.00024	0.999086	0.000161	0.00018	0.000167	0.000149	CS pos: 21-22. Pr: 0.9777
	PA3_04443_C4-dicarboxylate-binding_periplasmic_protein_DctP	SP	0.005972	0.82255	0.169925	0.000779	0.000384	0.000356	CS pos: 23-24. Pr: 0.7856
	PA3_04453_hypothetical_protein	SP	0.001396	0.676818	0.320846	0.000402	0.000268	0.000236	CS pos: 18-19. Pr: 0.6540
	PA3_04458_D-alanyl-D-alanine_endopeptidase	SP	0.000334	0.998953	0.000179	0.000199	0.000175	0.000153	CS pos: 23-24. Pr: 0.9496
	PA3_04460_Membrane-bound_lysozyme_inhibitor_of_C-type_lysozyme	LIPO	1e-06	0.000713	0.999337	0	0	0	CS pos: 18-19. Pr: 0.9893
	PA3_04472_hypothetical_protein	SP	0.000323	0.998952	0.000218	0.000177	0.000161	0.000146	CS pos: 21-22. Pr: 0.9788
	PA3_04476_Chitin-binding_protein_CbpD	SP	0.000203	0.999148	0.000161	0.000172	0.000144	0.000142	CS pos: 25-26. Pr: 0.9793
	PA3_04483_Neutral_ceramidase	SP	0.00028	0.998999	0.000191	0.000183	0.00017	0.000151	CS pos: 24-25. Pr: 0.9760
	PA3_04484_Non-hemolytic_phospholipase_C	TAT	1e-06	2e-06	0	0.999842	0.000136	0	CS pos: 38-39. Pr: 0.8644
	PA3_04501_hypothetical_protein	SP	0.000246	0.999205	0.000138	0.000149	0.000131	0.00013	CS pos: 26-27. Pr: 0.8528
	PA3_04521_hypothetical_protein	SP	0.000235	0.999166	0.000138	0.000153	0.00014	0.000133	CS pos: 19-20. Pr: 0.8996
	PA3_04551_hypothetical_protein	SP	0.000364	0.99886	0.000205	0.000193	0.000173	0.000176	CS pos: 23-24. Pr: 0.9664
	PA3_04559_putative_TonB-dependent_receptor	SP	0.000674	0.998494	0.000342	0.000169	0.000154	0.000147	CS pos: 31-32. Pr: 0.9632
	PA3_04562_hypothetical_protein	LIPO	0	1e-06	1.00005	0	0	0	CS pos: 19-20. Pr: 0.9958
	PA3_04563_hypothetical_protein	SP	0.000191	0.999208	0.000153	0.000156	0.000146	0.000134	CS pos: 21-22. Pr: 0.9786
	PA3_04564_hypothetical_protein	LIPO	0	1e-06	1.00005	0	0	0	CS pos: 19-20. Pr: 0.9950
	PA3_04574_Periplasmic_serine_endoprotease_DegP	SP	0.000304	0.998876	0.000268	0.000192	0.000195	0.000177	CS pos: 25-26. Pr: 0.9709
	PA3_04576_Sigma_factor_AlgU_regulatory_protein_MucB	SP	0.000314	0.998944	0.000173	0.000193	0.00017	0.000158	CS pos: 21-22. Pr: 0.9736
	PA3_04587_hypothetical_protein	SP	0.000211	0.999115	0.000196	0.000177	0.000151	0.000142	CS pos: 25-26. Pr: 0.9784
	PA3_04601_Putative_alkyl_aryl-sulfatase_YjcS	SP	0.000579	0.996796	0.002008	0.000232	0.000202	0.000183	CS pos: 17-18. Pr: 0.9603
	PA3_04603_hypothetical_protein	LIPO	5e-06	0.000854	0.999187	1e-06	1e-06	1e-06	CS pos: 16-17. Pr: 0.9885
	PA3_04605_hypothetical_protein	LIPO	3.7e-05	0.025882	0.974103	9e-06	1.2e-05	9e-06	CS pos: 19-20. Pr: 0.9504
	PA3_04606_hypothetical_protein	LIPO	0	1.6e-05	1.00003	0	0	0	CS pos: 17-18. Pr: 0.9944
	PA3_04611_hypothetical_protein	SP	0.000307	0.998975	0.000183	0.000178	0.000167	0.000155	CS pos: 19-20. Pr: 0.9848
	PA3_04612_hypothetical_protein	SP	0.001334	0.997435	0.000365	0.000447	0.000206	0.000181	CS pos: 29-30. Pr: 0.9626
	PA3_04618_hypothetical_protein	LIPO	0	1e-06	1.00006	0	0	0	CS pos: 14-15. Pr: 0.9948
	PA3_04634_hypothetical_protein	SP	0.000628	0.998371	0.000263	0.000247	0.000227	0.000224	CS pos: 24-25. Pr: 0.9730
	PA3_04658_hypothetical_protein	SP	0.002781	0.995542	0.001005	0.000244	0.000197	0.000192	CS pos: 19-20. Pr: 0.9450
	PA3_04674_Foldase_protein_PrsA_2	LIPO	0	0	1.00005	0	0	0	CS pos: 19-20. Pr: 0.9951
	PA3_04676_hypothetical_protein	SP	0.011621	0.987159	0.000459	0.000283	0.000235	0.000218	CS pos: 36-37. Pr: 0.9297
	PA3_04677_hypothetical_protein	SP	0.000226	0.999101	0.000198	0.000166	0.000154	0.000134	CS pos: 25-26. Pr: 0.9750
	PA3_04681_Heme_hemopexin_transporter_protein_HuxB	LIPO	0.000818	0.361978	0.636457	0.000328	0.000256	0.000148	CS pos: 26-27. Pr: 0.5963
	PA3_04683_Heme_hemopexin-binding_protein	SP	0.483109	0.491647	0.023301	0.001104	0.000481	0.000362	CS pos: 41-42. Pr: 0.4457
	PA3_04684_Alkaline_phosphatase_L	SP	0.00038	0.998683	0.000237	0.000252	0.000225	0.000191	CS pos: 23-24. Pr: 0.9725
	PA3_04687_Putative_type_II_secretion_system_protein_D	LIPO	5e-06	0.000178	0.999885	2e-06	1e-06	0	CS pos: 27-28. Pr: 0.9900
	PA3_04695_hypothetical_protein	PILIN	0.231842	0.001579	0.000213	1.1e-05	5e-06	0.766355	CS pos: 16-17. Pr: 0.4205
	PA3_04698_Ferripyoverdine_receptor	SP	0.000521	0.998587	0.000225	0.000246	0.000206	0.000195	CS pos: 26-27. Pr: 0.9392
	PA3_04699_hypothetical_protein	SP	0.000214	0.999182	0.000165	0.000151	0.000146	0.000132	CS pos: 22-23. Pr: 0.9780
	PA3_04726_hypothetical_protein	SP	0.00042	0.998886	0.000185	0.000182	0.000153	0.000149	CS pos: 19-20. Pr: 0.9738
	PA3_04727_hypothetical_protein	LIPO	0	0	1.00005	0	0	0	CS pos: 16-17. Pr: 0.9971
	PA3_04732_Type_II_secretion_system_protein_D	SP	0.012973	0.982037	0.004216	0.000264	0.000231	0.000239	CS pos: 27-28. Pr: 0.9282
	PA3_04754_hypothetical_protein	SP	0.0005	0.998672	0.000252	0.00019	0.000169	0.000174	CS pos: 17-18. Pr: 0.9739
	PA3_04755_hypothetical_protein	LIPO	1e-06	0.000551	0.999477	0	0	0	CS pos: 15-16. Pr: 0.9915
	PA3_04756_hypothetical_protein	LIPO	0	0	1.00009	0	0	0	CS pos: 18-19. Pr: 0.9957
	PA3_04766_hypothetical_protein	LIPO	0	0	1.00005	0	0	0	CS pos: 17-18. Pr: 0.9953
	PA3_04769_hypothetical_protein	SP	0.000337	0.998961	0.000191	0.00016	0.000168	0.000163	CS pos: 18-19. Pr: 0.9775
	PA3_04774_hypothetical_protein	SP	0.00032	0.999046	0.000175	0.000142	0.00014	0.000145	CS pos: 18-19. Pr: 0.9750
	PA3_04776_6-aminohexanoate-dimer_hydrolase	SP	0.001831	0.996819	0.000319	0.000367	0.000356	0.000303	CS pos: 24-25. Pr: 0.9757
	PA3_04800_Iron-regulated_protein_A	LIPO	0	0	1.00006	0	0	0	CS pos: 20-21. Pr: 0.9948
	PA3_04801_hypothetical_protein	LIPO	5.5e-05	0.045105	0.954799	2e-05	2.6e-05	1.9e-05	CS pos: 21-22. Pr: 0.9291
	PA3_04802_hypothetical_protein	LIPO	0	0.000117	0.999934	0	0	0	CS pos: 17-18. Pr: 0.9883
	PA3_04809_hypothetical_protein	SP	0.000486	0.998703	0.000186	0.000222	0.000191	0.00018	CS pos: 23-24. Pr: 0.7638
	PA3_04817_hypothetical_protein	SP	0.000238	0.999129	0.000156	0.000157	0.000133	0.000134	CS pos: 18-19. Pr: 0.9763
	PA3_04858_Penicillin-binding_protein_activator_LpoA	LIPO	0	0	1.00006	0	0	0	CS pos: 19-20. Pr: 0.9951
	PA3_04861_Osmotically-inducible_protein_Y	LIPO	0	0	1.00006	0	0	0	CS pos: 19-20. Pr: 0.9959
	PA3_04866_Ubiquinol-cytochrome_c_reductase_iron-sulfur_subunit	TAT	0	6e-06	0	0.999976	5e-06	0	CS pos: 45-46. Pr: 0.8321
	PA3_04872_hypothetical_protein	SP	0.000211	0.999144	0.000162	0.000154	0.000147	0.00014	CS pos: 18-19. Pr: 0.9779
	PA3_04879_Membrane-bound_lytic_murein_transglycosylase_B	LIPO	0	0	1.00006	0	0	0	CS pos: 16-17. Pr: 0.9953
	PA3_04888_putative_phospholipid-binding_protein_MlaC	SP	0.00032	0.998962	0.000173	0.000181	0.000175	0.000151	CS pos: 22-23. Pr: 0.9773
	PA3_04896_Lipopolysaccharide_export_system_protein_LptA	SP	0.000299	0.998998	0.00019	0.000174	0.000163	0.000145	CS pos: 24-25. Pr: 0.9529
	PA3_04914_Maf-like_protein_YhdE	TAT	0.011449	0.007217	0.004433	0.608557	0.368068	0.000267	CS pos: 33-34. Pr: 0.3221
	PA3_04921_Endolytic_peptidoglycan_transglycosylase_RlpA	LIPO	0	2e-06	1.00005	0	0	0	CS pos: 21-22. Pr: 0.9932
	PA3_04923_hypothetical_protein	SP	0.003799	0.945217	0.049957	0.000414	0.000299	0.000277	CS pos: 33-34. Pr: 0.9040
	PA3_04924_hypothetical_protein	SP	0.01707	0.981229	0.000445	0.000446	0.000374	0.000395	CS pos: 20-21. Pr: 0.9304
	PA3_04925_putative_lipoprotein_YfhM	SP	0.000634	0.9982	0.0005	0.000242	0.000214	0.000187	CS pos: 36-37. Pr: 0.9679
	PA3_04926_hypothetical_protein	SP	0.000219	0.99922	0.000142	0.000145	0.000127	0.000124	CS pos: 25-26. Pr: 0.9770
	PA3_04928_hypothetical_protein	SP	0.000668	0.998436	0.000352	0.000204	0.000162	0.000153	CS pos: 25-26. Pr: 0.9689
	PA3_04931_hypothetical_protein	SP	0.000298	0.998921	0.000237	0.000184	0.00018	0.000154	CS pos: 22-23. Pr: 0.9784
	PA3_04932_Periplasmic_dipeptide_transport_protein	SP	0.000581	0.998548	0.000216	0.00026	0.000197	0.000183	CS pos: 29-30. Pr: 0.9657
	PA3_04933_Periplasmic_dipeptide_transport_protein	SP	0.000287	0.999073	0.000184	0.00016	0.000139	0.00013	CS pos: 24-25. Pr: 0.9643
	PA3_04936_Periplasmic_dipeptide_transport_protein	SP	0.00088	0.998073	0.000336	0.000255	0.000211	0.000211	CS pos: 24-25. Pr: 0.9591
	PA3_04937_Porin_D	SP	0.00045	0.998592	0.000236	0.000272	0.000218	0.000183	CS pos: 24-25. Pr: 0.9712
	PA3_04938_Periplasmic_dipeptide_transport_protein	SP	0.002348	0.995241	0.001624	0.000333	0.00022	0.000216	CS pos: 23-24. Pr: 0.9479
	PA3_04950_putative_TonB-dependent_receptor_BfrD	SP	0.00051	0.99849	0.000266	0.000281	0.000225	0.000185	CS pos: 35-36. Pr: 0.9693
	PA3_04969_hypothetical_protein	SP	0.000268	0.999028	0.000208	0.000156	0.000144	0.000135	CS pos: 19-20. Pr: 0.9773
	PA3_04977_Heme_hemopexin-binding_protein	SP	0.057878	0.573955	0.365749	0.00124	0.000779	0.000388	CS pos: 53-54. Pr: 0.4886
	PA3_04984_Outer_membrane_protein_assembly_factor_BamD	LIPO	0	0	1.00006	0	0	0	CS pos: 17-18. Pr: 0.9956
	PA3_04994_Type_IV_pilus_biogenesis_factor_PilY1	SP	0.000449	0.998624	0.000238	0.000281	0.000204	0.000165	CS pos: 30-31. Pr: 0.9732
	PA3_04995_hypothetical_protein	SP	0.000293	0.998952	0.000242	0.000171	0.000163	0.000149	CS pos: 18-19. Pr: 0.9736
	PA3_05004_hypothetical_protein	SP	0.000278	0.999028	0.000186	0.000192	0.000167	0.000146	CS pos: 20-21. Pr: 0.9750
	PA3_05011_Alcohol_dehydrogenase_cytochrome_c_subunit	SP	0.000333	0.998965	0.000236	0.000161	0.000146	0.000134	CS pos: 23-24. Pr: 0.9745
	PA3_05018_hypothetical_protein	SP	0.000242	0.99909	0.000164	0.00016	0.00015	0.000139	CS pos: 19-20. Pr: 0.9783
	PA3_05019_hypothetical_protein	SP	0.001074	0.542769	0.455167	0.000328	0.000351	0.000293	CS pos: 19-20. Pr: 0.5160
	PA3_05027_hypothetical_protein	LIPO	0	9.8e-05	0.999951	0	0	0	CS pos: 23-24. Pr: 0.9893
	PA3_05028_Cytochrome_c551_peroxidase	SP	0.000348	0.998944	0.000213	0.000171	0.000159	0.000149	CS pos: 23-24. Pr: 0.9754
	PA3_05030_Outer_membrane_protein_P1	SP	0.00033	0.998915	0.000255	0.000169	0.000155	0.000142	CS pos: 35-36. Pr: 0.9633
	PA3_05031_hypothetical_protein	SP	0.00021	0.999127	0.000174	0.000169	0.000142	0.000136	CS pos: 25-26. Pr: 0.9717
	PA3_05033_hypothetical_protein	SP	0.000383	0.998952	0.000181	0.000164	0.000155	0.000146	CS pos: 19-20. Pr: 0.9714
	PA3_05035_putative_ABC_transporter_ATP-binding_protein_YknY	SP	0.162958	0.745558	0.086675	0.002556	0.00132	0.00092	CS pos: 43-44. Pr: 0.6915
	PA3_05039_Outer_membrane_protein_OprJ	LIPO	0	0	1.00005	0	0	0	CS pos: 19-20. Pr: 0.9936
	PA3_05049_hypothetical_protein	SP	0.000235	0.999104	0.000176	0.00017	0.000155	0.000143	CS pos: 24-25. Pr: 0.9783
	PA3_05054_Actin-binding_protein	SP	0.000451	0.998562	0.000245	0.000258	0.000242	0.00022	CS pos: 18-19. Pr: 0.9743
	PA3_05055_Catalase	SP	0.000568	0.99848	0.000236	0.000261	0.000217	0.000193	CS pos: 30-31. Pr: 0.9773
	PA3_05058_C4-dicarboxylate-binding_periplasmic_protein_DctP	SP	0.000252	0.999006	0.0002	0.00018	0.000187	0.000164	CS pos: 22-23. Pr: 0.9785
	PA3_05062_Alcohol_dehydrogenase_cytochrome_c_subunit	SP	0.000235	0.999045	0.000184	0.000188	0.000169	0.000147	CS pos: 22-23. Pr: 0.9773
	PA3_05064_Putative_xanthine_dehydrogenase_molybdenum-binding_subunit_XdhA	TAT	0	0	0	0.999993	0	0	CS pos: 33-34. Pr: 0.9248
	PA3_05066_hypothetical_protein	SP	0.000239	0.999148	0.000152	0.000162	0.000149	0.000137	CS pos: 21-22. Pr: 0.9767
	PA3_05067_Heme_hemopexin_transporter_protein_HuxB	SP	0.007947	0.741762	0.248491	0.000801	0.000527	0.000438	CS pos: 25-26. Pr: 0.6874
	PA3_05068_Heme_hemopexin-binding_protein	SP	0.00712	0.991814	0.000292	0.000374	0.000194	0.00017	CS pos: 42-43. Pr: 0.9533
	PA3_05075_Beta-barrel_assembly-enhancing_protease	LIPO	0	0	1.00006	0	0	0	CS pos: 18-19. Pr: 0.9959
	PA3_05084_hypothetical_protein	LIPO	0	0	1.00006	0	0	0	CS pos: 19-20. Pr: 0.9946
	PA3_05088_hypothetical_protein	SP	0.000413	0.998834	0.000248	0.000166	0.000172	0.000158	CS pos: 20-21. Pr: 0.9757
	PA3_05093_hypothetical_protein	SP	0.000289	0.998968	0.000217	0.000178	0.000164	0.000147	CS pos: 23-24. Pr: 0.9779
	PA3_05094_hypothetical_protein	SP	0.000587	0.534324	0.464405	0.000302	0.000199	0.000169	CS pos: 28-29. Pr: 0.5084
	PA3_05095_hypothetical_protein	SP	0.000289	0.999021	0.000169	0.000178	0.000163	0.000145	CS pos: 24-25. Pr: 0.9731
	PA3_05096_hypothetical_protein	SP	0.000401	0.998819	0.000206	0.000214	0.00017	0.000162	CS pos: 28-29. Pr: 0.9736
	PA3_05097_F1_capsule-anchoring_protein	SP	0.000361	0.998949	0.000197	0.000171	0.000155	0.000143	CS pos: 27-28. Pr: 0.9745
	PA3_05098_hypothetical_protein	LIPO	2e-05	0.006501	0.993503	3e-06	4e-06	3e-06	CS pos: 25-26. Pr: 0.9658
	PA3_05106_Lipid_A_deacylase_PagL	SP	0.002475	0.993123	0.001719	0.000926	0.000861	0.000854	CS pos: 23-24. Pr: 0.8921
	PA3_05112_Bacteriophage_adsorption_protein_A	LIPO	0	0	1.00004	0	0	0	CS pos: 16-17. Pr: 0.9970
	PA3_05113_Outer-membrane_lipoprotein_LolB	LIPO	0	0	1.00008	0	0	0	CS pos: 17-18. Pr: 0.9976
	PA3_05136_hypothetical_protein	SP	0.000249	0.999032	0.000223	0.00016	0.000158	0.000139	CS pos: 19-20. Pr: 0.9791
	PA3_05140_Ferric_aerobactin_receptor	SP	0.000291	0.998925	0.000199	0.000228	0.000165	0.000142	CS pos: 28-29. Pr: 0.9687
	PA3_05145_hypothetical_protein	SP	0.000359	0.998961	0.000152	0.000195	0.000156	0.000148	CS pos: 28-29. Pr: 0.9602
	PA3_05146_hypothetical_protein	SP	0.000444	0.998719	0.000205	0.000207	0.000204	0.000179	CS pos: 18-19. Pr: 0.9750
	PA3_05147_hypothetical_protein	SP	0.00032	0.99899	0.00018	0.000181	0.000164	0.000141	CS pos: 26-27. Pr: 0.9683
	PA3_05152_Iron-utilization_periplasmic_protein	SP	0.000419	0.998759	0.000264	0.000209	0.000174	0.000164	CS pos: 27-28. Pr: 0.9294
	PA3_05163_Protein-methionine-sulfoxide_reductase_catalytic_subunit_MsrP	TAT	2.4e-05	2.3e-05	1.3e-05	0.968083	0.031832	0	CS pos: 48-49. Pr: 0.8691
	PA3_05168_hypothetical_protein	SP	0.000306	0.999044	0.000179	0.000164	0.00015	0.000137	CS pos: 20-21. Pr: 0.9737
	PA3_05170_hypothetical_protein	LIPO	0	0	1.00004	0	0	0	CS pos: 18-19. Pr: 0.9970
	PA3_05176_hypothetical_protein	LIPO	0	0	1.00006	0	0	0	CS pos: 14-15. Pr: 0.9958
	PA3_05179_Hemin-binding_periplasmic_protein_HmuT	SP	0.000341	0.998949	0.000219	0.000196	0.000156	0.000141	CS pos: 23-24. Pr: 0.9711
	PA3_05181_Hemin_receptor	SP	0.000301	0.999095	0.000156	0.000156	0.000142	0.000132	CS pos: 25-26. Pr: 0.9715
	PA3_05183_hypothetical_protein	LIPO	0	1e-06	1.00006	0	0	0	CS pos: 20-21. Pr: 0.9955
	PA3_05185_hypothetical_protein	SP	0.000218	0.999179	0.000164	0.00016	0.000142	0.000129	CS pos: 22-23. Pr: 0.9741
	PA3_05189_hypothetical_protein	LIPO	0	0	1.00006	0	0	0	CS pos: 19-20. Pr: 0.9966
	PA3_05208_hypothetical_protein	SP	0.000547	0.573569	0.425116	0.000299	0.000242	0.000213	CS pos: 22-23. Pr: 0.5211
	PA3_05209_hypothetical_protein	SP	0.00038	0.998801	0.000251	0.000188	0.000168	0.000162	CS pos: 24-25. Pr: 0.6157
	PA3_05211_Osmotically-inducible_protein_Y	SP	0.000404	0.998718	0.000214	0.000244	0.000221	0.000187	CS pos: 25-26. Pr: 0.9703
	PA3_05238_Outer_membrane_protein_assembly_factor_BamE	LIPO	0	0	1.00002	0	0	0	CS pos: 21-22. Pr: 0.9960
	PA3_05257_hypothetical_protein	LIPO	0.001659	0.024992	0.973182	0.000161	4.4e-05	1.2e-05	CS pos: 31-32. Pr: 0.9934
	PA3_05266_hypothetical_protein	LIPO	8.4e-05	0.08368	0.916142	3.6e-05	3.9e-05	3.3e-05	CS pos: 19-20. Pr: 0.8904
	PA3_05267_Glycerophosphodiester_phosphodiesterase	LIPO	0.000204	0.172751	0.826754	9.2e-05	0.000114	9.2e-05	CS pos: 16-17. Pr: 0.8054
	PA3_05268_hypothetical_protein	LIPO	7.8e-05	0.08712	0.912718	3.2e-05	4.1e-05	3.2e-05	CS pos: 16-17. Pr: 0.8940
	PA3_05288_Formate_dehydrogenase,_nitrate-inducible,_major_subunit	TAT	0	0	0	0.999988	0	0	CS pos: 33-34. Pr: 0.9171
	PA3_05289_Lactonizing_lipase	SP	0.000289	0.998953	0.000188	0.000194	0.000192	0.000159	CS pos: 23-24. Pr: 0.9791
	PA3_05315_Ferrichrome-iron_receptor	LIPO	0.001296	0.473875	0.523623	0.000475	0.00039	0.000322	CS pos: 14-15. Pr: 0.4997
	PA3_05337_Aliphatic_amidase_expression-regulating_protein	SP	0.000808	0.809474	0.000298	0.188896	0.000305	0.000207	CS pos: 27-28. Pr: 0.7752
	PA3_05353_Phosphate_starvation-inducible_protein_PsiF	SP	0.000216	0.999198	0.000163	0.000143	0.000134	0.000127	CS pos: 21-22. Pr: 0.9782
	PA3_05355_Osmotically-inducible_putative_lipoprotein_OsmE	LIPO	0	0	1.00005	0	0	0	CS pos: 17-18. Pr: 0.9973
	PA3_05360_hypothetical_protein	SP	0.00021	0.999139	0.00015	0.000165	0.000147	0.000135	CS pos: 21-22. Pr: 0.9774
	PA3_05361_Protein-methionine-sulfoxide_reductase_catalytic_subunit_MsrP	TATLIPO	0.000296	0.000541	0.002159	0.045153	0.951849	4e-06	CS pos: 44-45. Pr: 0.7806
	PA3_05363_hypothetical_protein	SP	0.000361	0.998892	0.000191	0.000202	0.000187	0.000163	CS pos: 23-24. Pr: 0.9750
	PA3_05377_Porin-like_protein_NicP	SP	0.34319	0.646872	0.005543	0.001738	0.001076	0.001569	CS pos: 27-28. Pr: 0.6252
	PA3_05392_Leu_Ile_Val-binding_protein	SP	0.000264	0.999049	0.000169	0.000179	0.000158	0.000142	CS pos: 27-28. Pr: 0.9636
	PA3_05400_Thermolabile_hemolysin	LIPO	0.000935	0.326093	0.672185	0.000326	0.000247	0.000194	CS pos: 18-19. Pr: 0.6286
	PA3_05401_Azurin	SP	0.000297	0.999002	0.000185	0.000186	0.000171	0.000154	CS pos: 20-21. Pr: 0.9730
	PA3_05403_Murein_hydrolase_activator_NlpD	LIPO	0	0	1.00004	0	0	0	CS pos: 16-17. Pr: 0.9961
	PA3_05409_Beta-glucosidase_A	SP	0.000752	0.99802	0.000536	0.000234	0.000209	0.000193	CS pos: 39-40. Pr: 0.9567
	PA3_05429_N-acetylmuramoyl-L-alanine_amidase_AmiC	LIPO	0.00122	0.469017	0.528858	0.00045	0.000233	0.000205	CS pos: 19-20. Pr: 0.4866
	PA3_05446_hypothetical_protein	LIPO	0	0	1.00002	0	0	0	CS pos: 20-21. Pr: 0.9959
	PA3_05449_hypothetical_protein	SP	0.000515	0.998585	0.000241	0.00023	0.000206	0.000188	CS pos: 17-18. Pr: 0.9783
	PA3_05455_hypothetical_protein	LIPO	0	0	1.00004	0	0	0	CS pos: 18-19. Pr: 0.9956
	PA3_05457_Outer_membrane_protein_TolC	SP	0.000358	0.9988	0.000197	0.000216	0.000213	0.000176	CS pos: 20-21. Pr: 0.9732
	PA3_05466_hypothetical_protein	SP	0.000301	0.999025	0.000182	0.000158	0.000148	0.000155	CS pos: 19-20. Pr: 0.9770
	PA3_05469_hypothetical_protein	SP	0.002924	0.995801	0.000662	0.000217	0.000189	0.000183	CS pos: 40-41. Pr: 0.9443
	PA3_05517_hypothetical_protein	SP	0.000347	0.998593	0.000408	0.000246	0.000201	0.000176	CS pos: 25-26. Pr: 0.9647
	PA3_05524_Type_IV_pilus_biogenesis_and_competence_protein_PilQ	SP	0.000295	0.998951	0.000189	0.000178	0.000171	0.000154	CS pos: 23-24. Pr: 0.9747
	PA3_05525_hypothetical_protein	LIPO	0	0	1.00005	0	0	0	CS pos: 17-18. Pr: 0.9957
	PA3_05531_Beta-barrel_assembly-enhancing_protease	LIPO	0	0	1.00005	0	0	0	CS pos: 18-19. Pr: 0.9904
	PA3_05560_L-cystine-binding_protein_FliY	SP	0.000261	0.999049	0.000179	0.000179	0.000172	0.000152	CS pos: 23-24. Pr: 0.9779
	PA3_05562_Glucans_biosynthesis_protein_G	SP	0.066728	0.930705	0.001168	0.000774	0.000337	0.000261	CS pos: 35-36. Pr: 0.8940
	PA3_05566_Glutamate_aspartate_import_solute-binding_protein	SP	0.000279	0.998895	0.000223	0.000207	0.000187	0.000168	CS pos: 22-23. Pr: 0.9731
	PA3_05571_Putative_beta-lactamase_HcpC	SP	0.00034	0.999052	0.000179	0.000151	0.000138	0.000136	CS pos: 21-22. Pr: 0.9748
	PA3_05580_hypothetical_protein	SP	0.000188	0.999238	0.000145	0.000149	0.000131	0.000124	CS pos: 25-26. Pr: 0.9673
	PA3_05587_Glycine_betaine_proline_betaine-binding_periplasmic_protein	SP	0.000249	0.999087	0.000169	0.000165	0.000153	0.000142	CS pos: 24-25. Pr: 0.9727
	PA3_05591_Outer_membrane_lipoprotein_Blc	LIPO	0	1e-06	1.00004	0	0	0	CS pos: 20-21. Pr: 0.9960
	PA3_05592_hypothetical_protein	LIPO	0	2e-06	1.00004	0	0	0	CS pos: 18-19. Pr: 0.9953
	PA3_05596_Esterase_EstA	SP	0.000256	0.999042	0.000205	0.000173	0.000157	0.000142	CS pos: 24-25. Pr: 0.9772
	PA3_05604_hypothetical_protein	SP	0.000342	0.999045	0.000172	0.000156	0.000136	0.000141	CS pos: 19-20. Pr: 0.9691
	PA3_05606_hypothetical_protein	SP	0.000251	0.999134	0.000153	0.000152	0.000139	0.00013	CS pos: 18-19. Pr: 0.9798
	PA3_05607_hypothetical_protein	SP	0.001036	0.622279	0.375942	0.000261	0.000249	0.000223	CS pos: 19-20. Pr: 0.5881
	PA3_05618_Carboxy-terminal_processing_protease_CtpB	SP	0.000491	0.998647	0.000273	0.000218	0.00017	0.000156	CS pos: 23-24. Pr: 0.9704
	PA3_05619_hypothetical_protein	SP	0.000275	0.999035	0.000189	0.000166	0.000159	0.000143	CS pos: 20-21. Pr: 0.9789
	PA3_05621_hypothetical_protein	SP	0.000347	0.998932	0.000193	0.000181	0.000162	0.000147	CS pos: 22-23. Pr: 0.9566
	PA3_05622_hypothetical_protein	SP	0.000248	0.999073	0.000187	0.000168	0.000152	0.000138	CS pos: 21-22. Pr: 0.9760
	PA3_05623_hypothetical_protein	SP	0.001062	0.961114	0.036975	0.000383	0.000239	0.000215	CS pos: 25-26. Pr: 0.9087
	PA3_05640_ABC_transporter_arginine-binding_protein_1	SP	0.000232	0.999154	0.000164	0.000156	0.000155	0.000134	CS pos: 23-24. Pr: 0.9617
	PA3_05645_Solvent_efflux_pump_outer_membrane_protein_SrpC	LIPO	1e-06	2.4e-05	1.00001	0	0	0	CS pos: 24-25. Pr: 0.9932
	PA3_05655_C4-dicarboxylate-binding_periplasmic_protein_DctP	SP	0.000378	0.998741	0.000246	0.000198	0.0002	0.000176	CS pos: 23-24. Pr: 0.9758
	PA3_05671_hypothetical_protein	SP	0.000747	0.998232	0.000269	0.000272	0.000241	0.000212	CS pos: 20-21. Pr: 0.9616
	PA3_05674_Monofunctional_chorismate_mutase	SP	0.000208	0.999232	0.000151	0.000142	0.000132	0.000129	CS pos: 23-24. Pr: 0.9773
	PA3_05681_hypothetical_protein	SP	0.000274	0.999115	0.000167	0.000158	0.000147	0.000136	CS pos: 22-23. Pr: 0.9760
	PA3_05693_Glutamate--cysteine_ligase	TATLIPO	0.002191	0.005505	0.091882	0.448239	0.452119	5.9e-05	CS pos: 23-24. Pr: 0.3103
	PA3_05702_hypothetical_protein	SP	0.000249	0.999053	0.000194	0.000177	0.000158	0.000147	CS pos: 23-24. Pr: 0.9749
	PA3_05707_putative_binding_protein_component_of_ABC_iron_transporter	SP	0.000256	0.999056	0.000194	0.000168	0.000162	0.000144	CS pos: 21-22. Pr: 0.9776
	PA3_05724_hypothetical_protein	SP	0.000258	0.998973	0.000239	0.000191	0.000175	0.000155	CS pos: 22-23. Pr: 0.9739
	PA3_05762_hypothetical_protein	SP	0.000269	0.999048	0.000189	0.000157	0.000152	0.000143	CS pos: 22-23. Pr: 0.9746
	PA3_05768_Lipopeptide	LIPO	6e-06	6.6e-05	0.999916	0	0	0	CS pos: 20-21. Pr: 0.9787
	PA3_05776_hypothetical_protein	SP	0.000513	0.998671	0.000211	0.00022	0.00019	0.000164	CS pos: 25-26. Pr: 0.9704
	PA3_05784_hypothetical_protein	SP	0.000199	0.999192	0.000163	0.000156	0.000147	0.000135	CS pos: 22-23. Pr: 0.9704
	PA3_05792_Cytochrome_c5	SP	0.000297	0.999067	0.000163	0.000161	0.000149	0.000142	CS pos: 24-25. Pr: 0.9799
	PA3_05797_hypothetical_protein	SP	0.000321	0.999003	0.000185	0.000174	0.000163	0.000152	CS pos: 22-23. Pr: 0.9683
	PA3_05798_hypothetical_protein	LIPO	8e-06	0.002161	0.997865	2e-06	2e-06	1e-06	CS pos: 18-19. Pr: 0.9739
	PA3_05802_Cardiolipin_synthase_C	LIPO	0	0	1.00003	0	0	0	CS pos: 15-16. Pr: 0.9952
	PA3_05809_Periplasmic_dipeptide_transport_protein	SP	0.000203	0.999235	0.000144	0.000149	0.000132	0.00013	CS pos: 21-22. Pr: 0.9730
	PA3_05817_hypothetical_protein	LIPO	0.000496	0.401417	0.597294	0.000383	0.000238	0.00016	CS pos: 22-23. Pr: 0.4059
	PA3_05818_hypothetical_protein	TAT	5.9e-05	1e-06	2e-06	0.999156	0.00078	0	CS pos: 26-27. Pr: 0.5677
	PA3_05819_L-gulono-1,4-lactone_dehydrogenase	TAT	0	0	0	0.999971	5e-06	0	CS pos: 30-31. Pr: 0.9306
	PA3_05820_Cytochrome_c-555	LIPO	0.00031	0.061903	0.937615	6.2e-05	8.6e-05	3.7e-05	CS pos: 29-30. Pr: 0.9193
	PA3_05822_hypothetical_protein	SP	0.000211	0.999129	0.000164	0.00016	0.000149	0.000133	CS pos: 26-27. Pr: 0.9790
	PA3_05832_hypothetical_protein	LIPO	0	0	1.00006	0	0	0	CS pos: 16-17. Pr: 0.9978
	PA3_05851_hypothetical_protein	SP	0.000231	0.99911	0.000172	0.000172	0.000162	0.000138	CS pos: 21-22. Pr: 0.9630
	PA3_05855_Murein_DD-endopeptidase_MepM	SP	0.000337	0.999031	0.00016	0.000166	0.000148	0.000142	CS pos: 20-21. Pr: 0.9541
	PA3_05861_Phosphate-binding_protein_PstS	SP	0.000342	0.998956	0.000169	0.000187	0.000166	0.00015	CS pos: 24-25. Pr: 0.8775
	PA3_05875_Glycine_betaine_carnitine_transport_binding_protein_GbuC	SP	0.000987	0.993852	0.004349	0.000283	0.000256	0.000261	CS pos: 21-22. Pr: 0.9613
	PA3_05885_Glycine_betaine_carnitine_transport_binding_protein_GbuC	SP	0.0003	0.998964	0.000189	0.000186	0.000176	0.000158	CS pos: 22-23. Pr: 0.9791
	PA3_05886_HTH-type_transcriptional_regulator_CdhR	SP	0.315689	0.681619	0.001253	0.000426	0.000368	0.000623	CS pos: 21-22. Pr: 0.6319
	PA3_05901_hypothetical_protein	LIPO	0	1.5e-05	1.00002	0	0	0	CS pos: 19-20. Pr: 0.9956
	PA3_05902_hypothetical_protein	LIPO	0.000412	0.055679	0.943676	7.9e-05	0.00011	6.2e-05	CS pos: 16-17. Pr: 0.9165
	PA3_05912_hypothetical_protein	LIPO	0	1e-06	1.00003	0	0	0	CS pos: 19-20. Pr: 0.9959
	PA3_05921_hypothetical_protein	SP	0.000279	0.999052	0.000195	0.000159	0.000147	0.000134	CS pos: 22-23. Pr: 0.9768
	PA3_05940_hypothetical_protein	SP	0.000302	0.999001	0.000191	0.000166	0.000154	0.000148	CS pos: 23-24. Pr: 0.9765
	PA3_05946_hypothetical_protein	SP	0.000893	0.998345	0.000211	0.000183	0.000165	0.000162	CS pos: 19-20. Pr: 0.9717
	PA3_05959_hypothetical_protein	LIPO	1.4e-05	0.007494	0.992508	3e-06	4e-06	3e-06	CS pos: 14-15. Pr: 0.9707
	PA3_05968_Soluble_lytic_murein_transglycosylase	LIPO	0.000647	0.464629	0.533698	0.000381	0.000364	0.000268	CS pos: 15-16. Pr: 0.5080
	PA3_05971_hypothetical_protein	LIPO	0	0	1.00004	0	0	0	CS pos: 19-20. Pr: 0.9960
	PA3_05991_hypothetical_protein	SP	0.000409	0.998843	0.0002	0.000205	0.000162	0.000149	CS pos: 23-24. Pr: 0.9726
	PA3_06011_hypothetical_protein	SP	0.001031	0.705775	0.292332	0.000331	0.000263	0.000243	CS pos: 21-22. Pr: 0.6676
	PA3_06012_hypothetical_protein	SP	0.000299	0.998989	0.000236	0.000164	0.000161	0.000145	CS pos: 19-20. Pr: 0.9726
	PA3_06013_hypothetical_protein	SP	0.000623	0.891594	0.106919	0.000382	0.000249	0.00021	CS pos: 26-27. Pr: 0.8570
	PA3_06014_hypothetical_protein	SP	0.006352	0.974537	0.018205	0.000326	0.000268	0.000278	CS pos: 21-22. Pr: 0.5081
	PA3_06017_hypothetical_protein	SP	0.089258	0.9086	0.000956	0.000396	0.000371	0.000391	CS pos: 22-23. Pr: 0.8963
	PA3_06022_hypothetical_protein	SP	0.00042	0.998663	0.000206	0.000255	0.000214	0.000193	CS pos: 27-28. Pr: 0.9748
	PA3_06030_Inhibitor_of_vertebrate_lysozyme	SP	0.000402	0.998763	0.000232	0.000205	0.000201	0.000175	CS pos: 23-24. Pr: 0.9678
	PA3_06034_N-acetylmuramoyl-L-alanine_amidase_AmiD	LIPO	0	0	1.00008	0	0	0	CS pos: 16-17. Pr: 0.9971
	PA3_06038_Thiol_disulfide_interchange_protein_DsbA	SP	0.000219	0.999192	0.000157	0.000156	0.000141	0.000128	CS pos: 22-23. Pr: 0.9723
	PA3_06039_Cytochrome_c4	SP	0.000204	0.999162	0.000155	0.000157	0.000146	0.000134	CS pos: 20-21. Pr: 0.9805
	PA3_06040_Cytochrome_c5	SP	0.000227	0.999098	0.000165	0.000179	0.00016	0.000151	CS pos: 19-20. Pr: 0.9804
	PA3_06043_hypothetical_protein	SP	0.000408	0.998598	0.000274	0.000251	0.000241	0.000202	CS pos: 22-23. Pr: 0.9781
	PA3_06047_High-affinity_zinc_uptake_system_protein_ZnuA	SP	0.00038	0.99876	0.000333	0.000176	0.00017	0.000158	CS pos: 24-25. Pr: 0.9751
	PA3_06051_hypothetical_protein	LIPO	0	1e-06	1.00005	0	0	0	CS pos: 20-21. Pr: 0.9953
	PA3_06054_Membrane_lipoprotein_TpN32	SP	0.000231	0.999099	0.000172	0.000177	0.000167	0.000149	CS pos: 21-22. Pr: 0.9751
	PA3_06063_Beta-lactamase_OXA-133	SP	0.00047	0.998781	0.000239	0.00018	0.000162	0.000157	CS pos: 18-19. Pr: 0.9733
	PA3_06069_hypothetical_protein	SP	0.000286	0.999115	0.000158	0.000157	0.000134	0.000132	CS pos: 25-26. Pr: 0.9520
	PA3_06075_hypothetical_protein	LIPO	0	0	1.00007	0	0	0	CS pos: 17-18. Pr: 0.9969
	PA3_06082_hypothetical_protein	SP	0.000227	0.999166	0.000163	0.000148	0.00013	0.000128	CS pos: 17-18. Pr: 0.9816
	PA3_06086_hypothetical_protein	SP	0.000237	0.99908	0.000186	0.000157	0.000147	0.000147	CS pos: 21-22. Pr: 0.9793
	PA3_06087_N-acetylmuramoyl-L-alanine_amidase_AmiC	TAT	0.00767	0.025893	0.004589	0.916821	0.044788	0.00022	CS pos: 23-24. Pr: 0.6415
	PA3_06091_6-aminohexanoate-dimer_hydrolase	SP	0.000567	0.997493	0.001355	0.000216	0.000169	0.000155	CS pos: 25-26. Pr: 0.9626
	PA3_06092_hypothetical_protein	SP	0.207208	0.791703	0.000315	0.000282	0.000235	0.000248	CS pos: 14-15. Pr: 0.7313
	PA3_06094_hypothetical_protein	SP	0.001509	0.995786	0.000313	0.001753	0.000365	0.000283	CS pos: 24-25. Pr: 0.9655
	PA3_06102_L-Ala--D-Glu_endopeptidase	SP	0.003231	0.991947	0.004162	0.000234	0.000204	0.0002	CS pos: 29-30. Pr: 0.6419
